# Supplementary material for: Metabolic flux profiling of MDCK cells during growth and canine adenovirus vector production
Source: PubMed Central journal article supplement (PMC4804208; doi:10.1038/srep23529), 2016-03-23
Supplement: srep23529-s1.pdf [file srep23529-s1.pdf]

# **Metabolic flux profiling of MDCK cells during growth and canine adenovirus vector production**

Nuno Carinhas<sup>1#</sup>, Daniel AM Pais<sup>1,2#</sup>, Alexey Koshkin<sup>1,2</sup>, Paulo Fernandes<sup>1,2,†</sup>, Ana S Coroadinha<sup>1,2</sup>, Manuel JT Carrondo<sup>1,2</sup>, Paula M Alves<sup>1,2</sup>, Ana P Teixeira<sup>1,2\*</sup>

<sup>1</sup>iBET, Instituto de Biologia Experimental e Tecnológica, Apartado 12, 2780-901 Oeiras, Portugal;

<sup>2</sup>Instituto de Tecnologia Química e Biológica António Xavier, Universidade Nova de Lisboa, Avenida da República, 2780-157 Oeiras, Portugal

#Equal contribution

†Current address: Autolus, London, UK

\*Corresponding author: anat@itqb.unl.pt

**Supplementary information: complete metabolic network model used for nonstationary  $^{13}\text{C}$ -MFA.**

**Glycolysis**

---

- R1 G6P (abcdef)  $\leftrightarrow$  F6P (abcdef)
- R2 F6P (abcdef)  $\rightarrow$  FBP (abcdef)
- R3 FBP (abcdef)  $\leftrightarrow$  DHAP (cba) + GAP (def)
- R4 DHAP (abc)  $\leftrightarrow$  GAP (abc)
- R5 GAP (abc)  $\leftrightarrow$  3PG (abc)
- R6 3PG (abc)  $\leftrightarrow$  PEP (abc)
- R7 PEP (abc)  $\rightarrow$  Pyr.c (abc)

**Pentose-phosphate pathway**

---

- R8 G6P (abcdef)  $\rightarrow$  P5P (bcdef) + CO<sub>2</sub> (a)
- R9 P5P (abcde) + P5P (pqrst)  $\leftrightarrow$  GAP (rst) + S7P (pqabcde)
- R10 S7P (abcdefg) + GAP (xyz)  $\leftrightarrow$  E4P (defg) + F6P (abcxyz)
- R11 E4P (abcd) + P5P (pqrst)  $\leftrightarrow$  GAP (rst) + F6P (pqabcd)

**Lactate and alanine accumulation**

---

- R12 Pyr.c (abc)  $\leftrightarrow$  Lac (abc)
- R13 Pyr.c (abc)  $\leftrightarrow$  Ala (abc)

**TCA cycle and pyruvate cycling**

---

- R14 Pyr.m (abc)  $\rightarrow$  AcCoA.m (bc) + CO<sub>2</sub> (a)
- R15 Pyr.m (abc) + CO<sub>2</sub> (d)  $\rightarrow$  OAA (abcd)
- R16 OAA (abcd) + AcCoA.m (ef)  $\rightarrow$  Cit (dcbfea)
- R17 Cit (abcdef)  $\leftrightarrow$  AKG (abcde) + CO<sub>2</sub> (f)
- R18 AKG (abcde)  $\rightarrow$  SucCoA (bcde) + CO<sub>2</sub> (a)
- R19 SucCoA (abcd)  $\leftrightarrow$  Suc (abcd)
- R20 Suc (abcd)  $\leftrightarrow$  Fum (abcd)
- R21 Fum (abcd)  $\leftrightarrow$  Mal (abcd)
- R22 Mal (abcd)  $\leftrightarrow$  OAA (abcd)
- R23 Mal (abcd)  $\rightarrow$  Pyr.m (abc) + CO<sub>2</sub> (d)

**Lipid precursor generation**

---

- R24 Cit (dcbfea)  $\rightarrow$  OAA (abcd) + AcCoA.c (ef)

**Amino acids metabolism**

---

- R25 Gln (abcde)  $\rightarrow$  Glu (abcde)
- R26 AKG (abcde)  $\leftrightarrow$  Glu (abcde)
- R27 Asn (abcd)  $\leftrightarrow$  Asp (abcd)
- R28 Asp (abcd)  $\leftrightarrow$  OAA (abcd)
- R29 3PG (abc)  $\rightarrow$  Ser (abc)
- R30 Ser (abc)  $\rightarrow$  Pyr.c (abc)
- R31 Ser (abc)  $\leftrightarrow$  Gly (ab) + C1 (c)
- R32 Glu (abcde)  $\leftrightarrow$  Pro (abcde)
- R33 Val (abcde) + CO<sub>2</sub> (f)  $\rightarrow$  Suc (dcef) + CO<sub>2</sub> (a) + CO<sub>2</sub> (b)

- R34 Ile (abcdef) + CO<sub>2</sub> (g) → Suc (bcdg) + AcCoA.m (ef) + CO<sub>2</sub> (a)  
 R35 Leu (abcdef) + CO<sub>2</sub> (g) → AcCoA.m (bc) + AcCoA.m (de) + AcCoA.m (gf) + CO<sub>2</sub> (a)  
 R36 Thr (abcd) → AcCoA.m (cd) + Gly (ab)  
 R37 Phe (abcdefghi) → Tyr (abcdefghi)  
 R38 Tyr (abcdefghi) → Fum (defg) + AcCoA.m (bc) + AcCoA.m (hi) + CO<sub>2</sub> (a)  
 R39 Met (abcde) + Ser (fgh) + CO<sub>2</sub> (i) → Suc (bcdi) + Cys.snk (fgh) + CO<sub>2</sub> (a) + C1 (e)  
 R40 Lys (abcdef) → CO<sub>2</sub> (a) + CO<sub>2</sub> (f) + AcCoA.m (bc) + AcCoA.m (de)  
 R41 His (abcdef) → Glu (edcba) + C1 (f)  
 R42 Arg (abcdef) → Glu (abcde) + Urea.snk (f)  
 R43 Glu (abcde) + CO<sub>2</sub> (f) → Arg (abcdef)

### Intracellular transport

---

- R44 Pyr.c (abc) ↔ Pyr.m (abc)

### Extracellular transport

---

- R45 CO<sub>2</sub> (a) ↔ CO<sub>2</sub>.ext (a)  
 R46 Glc.ext (abcdef) → G6P (abcdef)  
 R47 Lac (abc) ↔ Lac.ext (abc)  
 R48 Ala (abc) ↔ Ala.ext (abc)  
 R49 Gln.ext (abcde) → Gln (abcde)  
 R50 Glu (abcde) ↔ Glu.ext (abcde)  
 R51 Asp (abcd) ↔ Asp.ext (abcd)  
 R52 Asn (abcd) ↔ Asn.ext (abcd)  
 R53 Ser.ext (abc) ↔ Ser (abc)  
 R54 Gly (ab) ↔ Gly.ext (ab)  
 R55 Pro.ext (abcde) ↔ Pro (abcde)  
 R56 Val.ext (abcde) → Val (abcde)  
 R57 Ile.ext (abcdef) → Ile (abcdef)  
 R58 Leu.ext (abcdef) → Leu (abcdef)  
 R59 Thr.ext (abcd) → Thr (abcd)  
 R60 Phe.ext (abcdefghi) → Phe (abcdefghi)  
 R61 Tyr.ext (abcdefghi) → Tyr (abcdefghi)  
 R62 Met.ext (abcde) → Met (abcde)  
 R63 Lys.ext (abcdef) → Lys (abcdef)  
 R64 His.ext (abcdef) → His (abcdef)  
 R65 Arg.ext (abcdef) ↔ Arg (abcdef)

### Biomass formation

---

- R66  $324 \cdot \text{Ala} + 208.4 \cdot \text{Glu} + 173.9 \cdot \text{Gln} + 355.4 \cdot \text{Gly} + 287.8 \cdot \text{Ser} + 307.8 \cdot \text{Lys} + 304.6 \cdot \text{Leu} + 175 \cdot \text{Ile} + 203.6 \cdot \text{Arg} + 254.8 \cdot \text{Asp} + 208.4 \cdot \text{Thr} + 224.6 \cdot \text{Val} + 74.52 \cdot \text{Met} + 118.3 \cdot \text{Phe} + 98.28 \cdot \text{Tyr} + 77.22 \cdot \text{His} + 169 \cdot \text{Pro} + 155.5 \cdot \text{Asn} + 159.8 \cdot \text{G6P} + 125.8 \cdot \text{P5P} + 129.7 \cdot \text{C1} + 65.88 \cdot \text{DHAP} + 1362 \cdot \text{AcCoA.c} \rightarrow \text{Biomass}$
- 

Coefficients in the lumped biomass formation reaction represent the nmol content in 10<sup>6</sup> cells. Suffix abbreviations: mitochondrial (.m), cytosolic (.c), extracellular (.ext), sink (.snk). Sink pools were used for metabolites that could not be balanced (Cys, Urea).

**Supplementary information: list of balanced and unbalanced metabolite pools.**

Balanced metabolite pools: G6P, F6P, FBP, DHAP, GAP, 3PG, PEP, Pyr.c, Pyr.m, P5P, CO<sub>2</sub>, S7P, E4P, Lac, Ala, AcCoA.m, AcCoA.c, OAA, Cit, AKG, SucCoA, Suc, Fum, Mal, Gln, Glu, Asn, Asp, Ser, Gly, C1, Pro, Val, Ile, Leu, Thr, Phe, Tyr, Met, Lys, His, Arg. Unbalanced metabolite pools: CO<sub>2</sub>.ext, Glc.ext, Lac.ext, Ala.ext, Gln.ext, Glu.ext, Asp.ext, Asn.ext, Ser.ext, Gly.ext, Pro.ext, Val.ext, Ile.ext, Leu.ext, Thr.ext, Phe.ext, Tyr.ext, Met.ext, Lys.ext, His.ext, Arg.ext, Cys.snk, Urea.snk, Biomass.

**Supplementary information: calculation of MID errors for flux estimation.**

In our experimental design, each MID datapoint corresponds to an independent culture, so that the measured MID dynamic profiles incorporate both analytical and biological variability. However, individual errors for MID measurements could not be experimentally determined. Therefore, a default standard error vector was initially assumed by INCA: 0.3 mol% for mass isotopomer abundances  $\leq 0.5$  mol% with linear scaling up to 1 mol% for mass isotopomer abundances  $\geq 25$  mol%. After flux estimation, reasonably good fittings were obtained for all metabolites in each culture condition, but the computed weighted sum of squared residuals (SSR) were grossly above the expected 95% confidence interval. In an attempt to further improve fitting of the data, compartmentalization of different metabolites involved in shuttle systems between the cytosol and mitochondria (such as Mal, OAA and Cit; Ahn and Antoniewicz, 2011; 2013), and use of dilution pools previously described (such as Suc; Metallo et al., 2012) were explored. However, these modifications did not materially reduce SSR values. We then concluded the reason for the high SSR values was an inappropriate account of measurement errors, indicating that the assumed errors did not represent true experimental variability. In order to better harness this variability, we subtracted MID

fittings from MID measurements for all timepoints. The resulting values were then subject to a minimum cutoff of 0.3 mol% and were used as new error estimates replacing the initial default errors assumed by INCA. After this procedure, we were able to obtain flux estimation solutions with statistically accepted fits for both growth (810.4; 786.3-949.4; 95% conf., 866 degrees of freedom) and infected cultures (853.6; 780.6-943.2; 95% conf., 860 degrees of freedom).

Ahn WS, Antoniewicz MR. 2011. Metabolic flux analysis of CHO cells at growth and non-growth phases using isotopic tracers and mass spectrometry. *Metab Eng* 13:598–609.

Ahn WS, Antoniewicz MR. 2013. Parallel labeling experiments with [1,2-<sup>13</sup>C]glucose and [U-<sup>13</sup>C]glutamine provide new insights into CHO cell metabolism. *Metab Eng* 15:34–47.

Metallo CM, Gameiro PA, Bell EL, Mattaini KR, Yang J, Hiller K, Jewell CM, Johnson ZR, Irvine DJ, Guarente L, Kelleher JK, Heiden MG, Iliopoulos O, Stephanopoulos G. 2012. Reductive glutamine metabolism by IDH1 mediates lipogenesis under hypoxia. *Nature* 481:380–384.

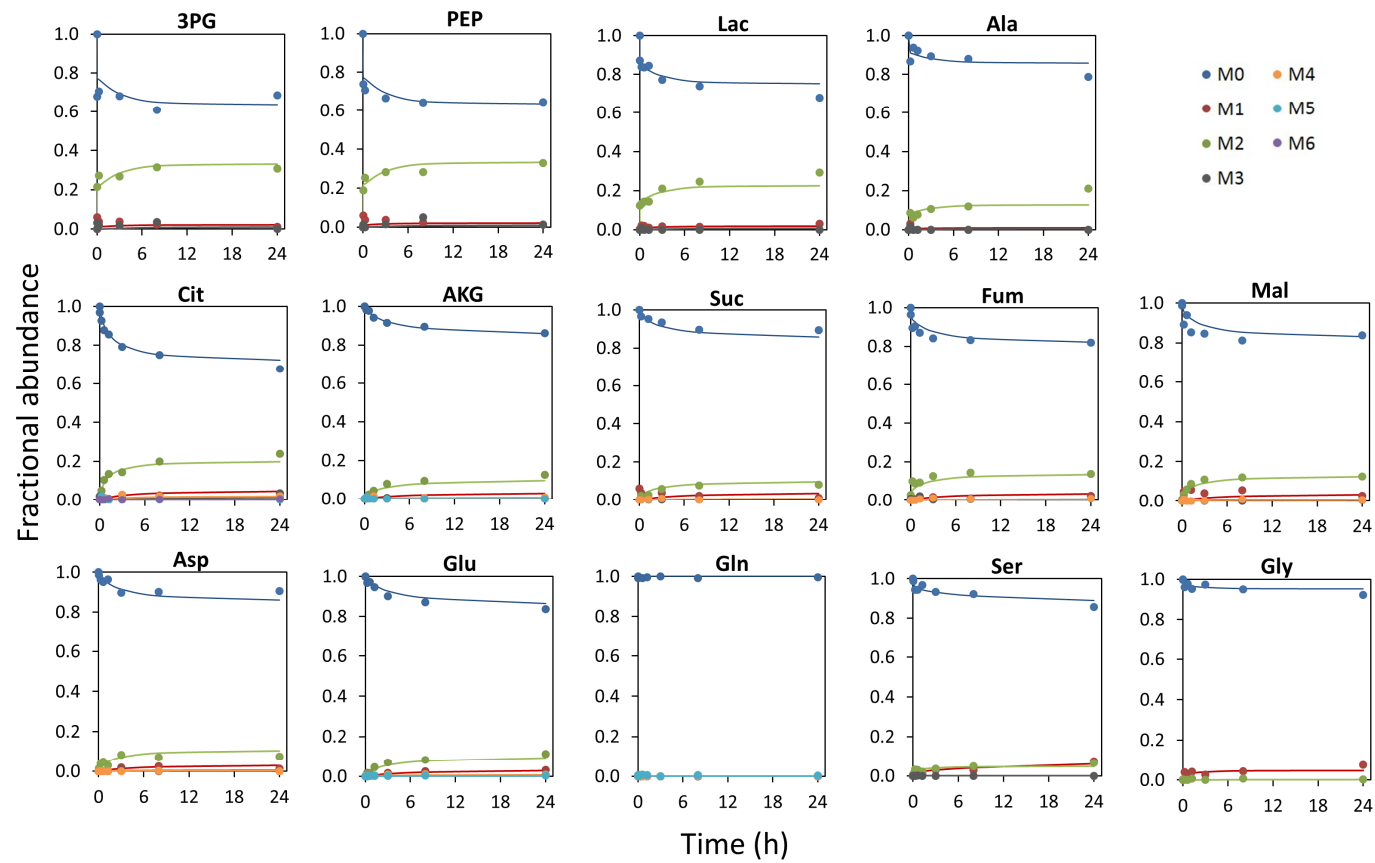

**Figure S1** – Experimental and simulated intracellular  $^{13}\text{C}$ -labelling dynamics during CAV2 infection from  $[1,2-^{13}\text{C}]$ glucose. Circle markers correspond to GC-MS measurements corrected for natural isotope abundance. Lines correspond to fitted MIDs from nonstationary  $^{13}\text{C}$ -MFA flux estimation of parallel labelling experiments.

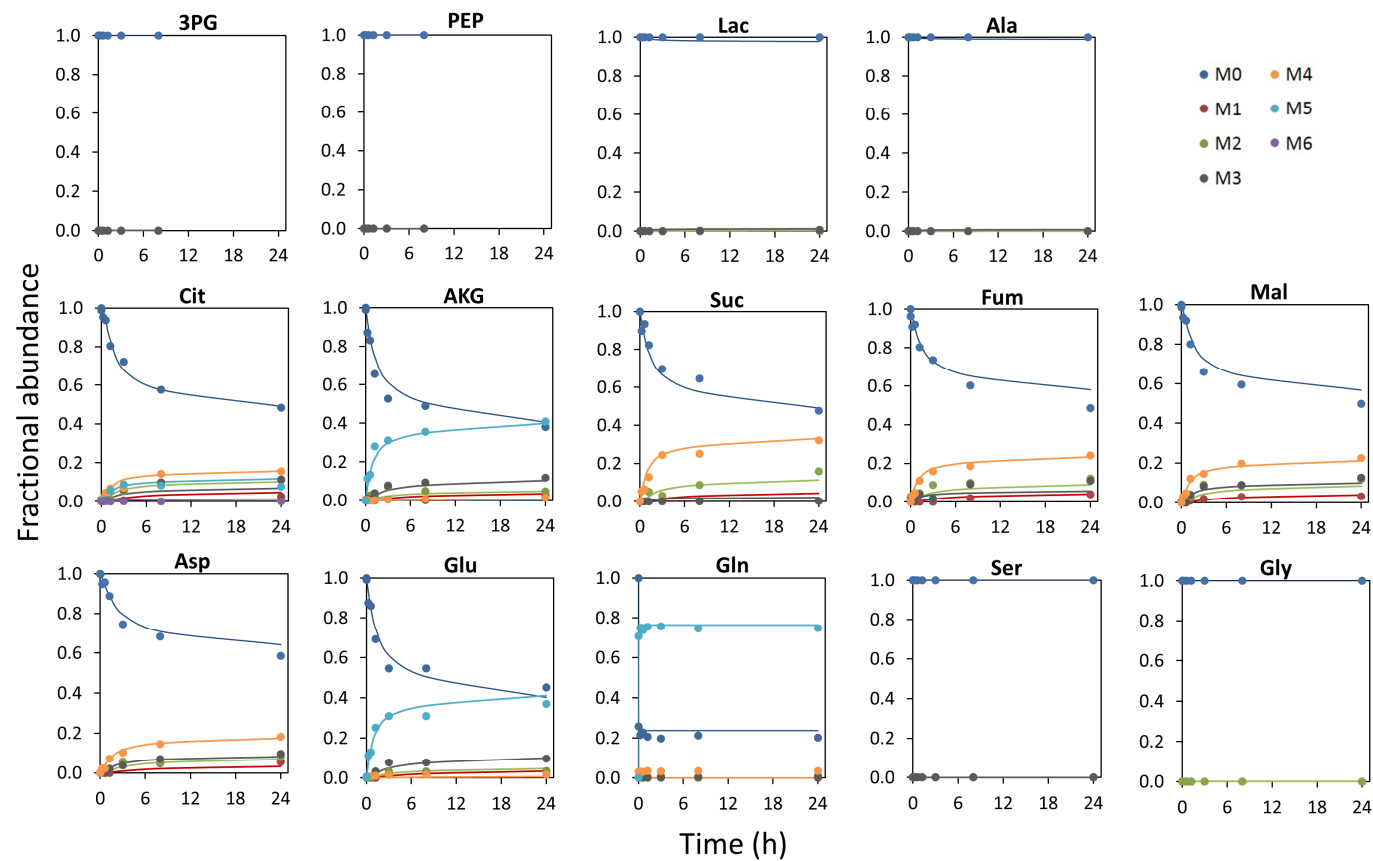

**Figure S2** – Experimental and simulated intracellular  $^{13}\text{C}$ -labelling dynamics during CAV2 infection from  $[\text{U-}^{13}\text{C}]$ glutamine. Circle markers correspond to GC-MS measurements corrected for natural isotope abundance. Lines correspond to fitted MIDs from nonstationary  $^{13}\text{C}$ -MFA flux estimation of parallel labelling experiments.

**Table S1** - Measured metabolic uptake and production rates for MDCK cells (mock-infected) and CAV2-infected MDCK cells.

|            | <b>Growth</b> | <b>SD</b> | <b>Infection</b> | <b>SD</b> |
|------------|---------------|-----------|------------------|-----------|
| <b>Glc</b> | -630.77       | 53.47     | -800.34          | 63.95     |
| <b>Lac</b> | 1081.95       | 42.05     | 1710.79          | 82.04     |
| <b>NH3</b> | 20.17         | 1.15      | 59.2             | 6.06      |
| <b>Gln</b> | -82.63        | 15.66     | -117.14          | 11.69     |
| <b>Ala</b> | 29.36         | 5.39      | 38.51            | 5.04      |
| <b>Ser</b> | -11.89        | 2.49      | -17.84           | 1.94      |
| <b>Glu</b> | 12.31         | 1.62      | 15.78            | 2.69      |
| <b>Gly</b> | 3.83          | 0.62      | 3.26             | 1.1       |
| <b>Asp</b> | 2.71          | 0.84      | 0.86             | 1.11      |
| <b>Asn</b> | 0.24          | 2.43      | -6.05            | 4.73      |
| <b>Arg</b> | -7.72         | 1.36      | -12.69           | 0.95      |
| <b>His</b> | -1.81         | 0.29      | -2.57            | 0.44      |
| <b>Thr</b> | -2.96         | 0.71      | -5.67            | 0.96      |
| <b>Pro</b> | -11.8         | 3.14      | -12.77           | 3.66      |
| <b>Tyr</b> | -1.64         | 0.25      | -3.46            | 0.18      |
| <b>Val</b> | -3.84         | 2.27      | -13.71           | 2.2       |
| <b>Met</b> | -4.36         | 0.92      | -5.76            | 0.86      |
| <b>Ile</b> | -7.53         | 0.49      | -11.19           | 0.43      |
| <b>Leu</b> | -10.35        | 0.52      | -15.73           | 1.54      |
| <b>Lys</b> | -5.93         | 1.27      | -9.63            | 0.58      |
| <b>Phe</b> | -1.66         | 0.23      | -3.13            | 0.91      |
| <b>μ</b>   | 0.0343        | 0.0057    | 0.0124           | 0.0072    |

Specific extracellular rates were determined during the first 24 h after label administration, in units of nmol/10<sup>6</sup> cells/h, except biomass formation ( $\mu = \text{h}^{-1}$ ).

Negative values indicate cellular uptake.



**Table S2** - Measured mass isotopomer distributions and calculated errors from [1,2-<sup>13</sup>C]glucose under growth conditions (mock infection).

| <b>Time (h)</b> | <b>0.00</b> | <b>0.02</b> | <b>0.25</b> | <b>0.608</b> | <b>1.217</b> | <b>3</b> | <b>8</b> | <b>24</b> |        |        |        |        |        |        |        |        |
|-----------------|-------------|-------------|-------------|--------------|--------------|----------|----------|-----------|--------|--------|--------|--------|--------|--------|--------|--------|
| 3PG_459 (M0)    | 1.0000      | 0.0030      | 0.6692      | 0.1231       | 0.7824       | 0.0034   | 0.5450   | 0.2313    | -      | -      | 0.6481 | 0.0786 | 0.5485 | 0.1242 | 0.6762 | 0.0373 |
| 3PG_460 (M1)    | 0.0000      | 0.0030      | 0.0440      | 0.0347       | 0.0245       | 0.0148   | 0.0600   | 0.0497    | -      | -      | 0.0359 | 0.0223 | 0.1095 | 0.0925 | 0.0155 | 0.0040 |
| 3PG_461 (M2)    | 0.0000      | 0.0030      | 0.2869      | 0.0885       | 0.1629       | 0.0414   | 0.3950   | 0.1820    | -      | -      | 0.3160 | 0.0582 | 0.3419 | 0.0369 | 0.2914 | 0.0406 |
| 3PG_462 (M3)    | 0.0000      | 0.0030      | 0.0000      | 0.0030       | 0.0302       | 0.0301   | 0.0000   | 0.0030    | -      | -      | 0.0000 | 0.0030 | 0.0000 | 0.0051 | 0.0169 | 0.0074 |
| PEP_369 (M0)    | 1.0000      | 0.0030      | 0.8526      | 0.0042       | 0.8429       | 0.0568   | 0.6484   | 0.1281    | -      | -      | 0.8126 | 0.0857 | 0.7082 | 0.0354 | 0.7600 | 0.1209 |
| PEP_370 (M1)    | 0.0000      | 0.0030      | 0.0000      | 0.0068       | 0.0286       | 0.0189   | 0.0173   | 0.0070    | -      | -      | 0.0000 | 0.0136 | 0.0179 | 0.0030 | 0.0153 | 0.0042 |
| PEP_371 (M2)    | 0.0000      | 0.0030      | 0.1474      | 0.0030       | 0.1185       | 0.0854   | 0.3145   | 0.1017    | -      | -      | 0.1866 | 0.0710 | 0.2739 | 0.0310 | 0.2214 | 0.1107 |
| PEP_372 (M3)    | 0.0000      | 0.0030      | 0.0000      | 0.0030       | 0.0100       | 0.0099   | 0.0198   | 0.0195    | -      | -      | 0.0008 | 0.0030 | 0.0000 | 0.0052 | 0.0034 | 0.0061 |
| Lac_261 (M0)    | 1.0000      | 0.0030      | 0.8862      | 0.0033       | 0.8678       | 0.0241   | 0.8361   | 0.0030    | 0.8186 | 0.0058 | 0.7762 | 0.0214 | 0.7457 | 0.0111 | 0.6879 | 0.0431 |
| Lac_262 (M1)    | 0.0000      | 0.0030      | 0.0067      | 0.0030       | 0.0138       | 0.0066   | 0.0156   | 0.0077    | 0.0149 | 0.0058 | 0.0168 | 0.0053 | 0.0240 | 0.0091 | 0.0290 | 0.0118 |
| Lac_263 (M2)    | 0.0000      | 0.0030      | 0.1071      | 0.0030       | 0.1184       | 0.0307   | 0.1483   | 0.0075    | 0.1666 | 0.0030 | 0.2033 | 0.0138 | 0.2303 | 0.0058 | 0.2831 | 0.0384 |
| Lac_264 (M3)    | 0.0000      | 0.0030      | 0.0000      | 0.0030       | 0.0000       | 0.0030   | 0.0000   | 0.0030    | 0.0000 | 0.0030 | 0.0037 | 0.0030 | 0.0000 | 0.0039 | 0.0000 | 0.0071 |
| Lac23_233 (M0)  | 1.0000      | 0.0030      | 0.8975      | 0.0080       | 0.8717       | 0.0279   | 0.8493   | 0.0130    | 0.8312 | 0.0064 | 0.7749 | 0.0238 | 0.7568 | 0.0030 | 0.6916 | 0.0425 |
| Lac23_234 (M1)  | 0.0000      | 0.0030      | 0.0003      | 0.0047       | 0.0065       | 0.0030   | 0.0091   | 0.0030    | 0.0010 | 0.0080 | 0.0097 | 0.0030 | 0.0168 | 0.0030 | 0.0289 | 0.0130 |
| Lac23_235 (M2)  | 0.0000      | 0.0030      | 0.1022      | 0.0033       | 0.1218       | 0.0273   | 0.1417   | 0.0142    | 0.1677 | 0.0030 | 0.2154 | 0.0254 | 0.2264 | 0.0030 | 0.2795 | 0.0295 |
| Ala_260 (M0)    | 1.0000      | 0.0030      | 0.9865      | 0.0125       | 0.9771       | 0.0058   | 0.9576   | 0.0171    | 0.9271 | 0.0160 | 0.9015 | 0.0234 | 0.8655 | 0.0181 | 0.7951 | 0.0336 |
| Ala_261 (M1)    | 0.0000      | 0.0030      | 0.0000      | 0.0030       | 0.0000       | 0.0030   | 0.0000   | 0.0030    | 0.0000 | 0.0043 | 0.0000 | 0.0068 | 0.0000 | 0.0093 | 0.0000 | 0.0109 |
| Ala_262 (M2)    | 0.0000      | 0.0030      | 0.0135      | 0.0125       | 0.0229       | 0.0046   | 0.0424   | 0.0142    | 0.0729 | 0.0115 | 0.0985 | 0.0159 | 0.1299 | 0.0111 | 0.2049 | 0.0491 |
| Ala_263 (M3)    | 0.0000      | 0.0030      | 0.0000      | 0.0030       | 0.0000       | 0.0030   | 0.0000   | 0.0030    | 0.0000 | 0.0030 | 0.0000 | 0.0030 | 0.0046 | 0.0030 | 0.0000 | 0.0045 |
| Ala23_232 (M0)  | 1.0000      | 0.0030      | 0.9684      | 0.0306       | 0.9421       | 0.0290   | 0.9248   | 0.0158    | 0.9126 | 0.0030 | 0.8843 | 0.0055 | 0.8455 | 0.0032 | 0.7740 | 0.0566 |
| Ala23_233 (M1)  | 0.0000      | 0.0030      | 0.0000      | 0.0030       | 0.0000       | 0.0030   | 0.0000   | 0.0030    | 0.0021 | 0.0030 | 0.0000 | 0.0067 | 0.0400 | 0.0313 | 0.0062 | 0.0030 |
| Ala23_234 (M2)  | 0.0000      | 0.0030      | 0.0316      | 0.0306       | 0.0579       | 0.0304   | 0.0752   | 0.0185    | 0.0853 | 0.0030 | 0.1157 | 0.0030 | 0.1145 | 0.0280 | 0.2198 | 0.0606 |
| Cit_591 (M0)    | 1.0000      | 0.0030      | 0.9474      | 0.0247       | 0.9104       | 0.0141   | 0.8864   | 0.0062    | 0.8555 | 0.0086 | 0.8277 | 0.0084 | 0.7746 | 0.0052 | 0.6575 | 0.0770 |
| Cit_592 (M1)    | 0.0000      | 0.0030      | 0.0000      | 0.0030       | 0.0000       | 0.0035   | 0.0000   | 0.0063    | 0.0000 | 0.0110 | 0.0000 | 0.0221 | 0.0000 | 0.0335 | 0.0407 | 0.0030 |
| Cit_593 (M2)    | 0.0000      | 0.0030      | 0.0381      | 0.0120       | 0.0775       | 0.0079   | 0.1060   | 0.0091    | 0.1230 | 0.0047 | 0.1460 | 0.0030 | 0.1990 | 0.0230 | 0.2427 | 0.0480 |

|              |        |        |        |        |        |        |        |        |        |        |        |        |        |        |        |        |
|--------------|--------|--------|--------|--------|--------|--------|--------|--------|--------|--------|--------|--------|--------|--------|--------|--------|
| Cit_594 (M3) | 0.0000 | 0.0030 | 0.0120 | 0.0119 | 0.0080 | 0.0078 | 0.0067 | 0.0062 | 0.0214 | 0.0202 | 0.0212 | 0.0178 | 0.0000 | 0.0070 | 0.0154 | 0.0047 |
| Cit_595 (M4) | 0.0000 | 0.0030 | 0.0025 | 0.0030 | 0.0042 | 0.0030 | 0.0002 | 0.0034 | 0.0000 | 0.0054 | 0.0014 | 0.0073 | 0.0114 | 0.0030 | 0.0424 | 0.0250 |
| Cit_596 (M5) | 0.0000 | 0.0030 | 0.0000 | 0.0030 | 0.0000 | 0.0030 | 0.0000 | 0.0030 | 0.0000 | 0.0030 | 0.0038 | 0.0037 | 0.0149 | 0.0145 | 0.0013 | 0.0030 |
| Cit_597 (M6) | 0.0000 | 0.0030 | 0.0000 | 0.0030 | 0.0000 | 0.0030 | 0.0007 | 0.0030 | 0.0000 | 0.0030 | 0.0000 | 0.0030 | 0.0000 | 0.0030 | 0.0000 | 0.0030 |
| AKG_346 (M0) | 1.0000 | 0.0030 | 0.9481 | 0.0516 | 0.9859 | 0.0039 | 0.9754 | 0.0030 | 0.9496 | 0.0093 | 0.8900 | 0.0394 | 0.9037 | 0.0048 | 0.8583 | 0.0144 |
| AKG_347 (M1) | 0.0000 | 0.0030 | 0.0322 | 0.0322 | 0.0000 | 0.0030 | 0.0000 | 0.0030 | 0.0000 | 0.0040 | 0.0008 | 0.0105 | 0.0000 | 0.0197 | 0.0000 | 0.0265 |
| AKG_348 (M2) | 0.0000 | 0.0030 | 0.0146 | 0.0142 | 0.0135 | 0.0039 | 0.0246 | 0.0033 | 0.0371 | 0.0030 | 0.0967 | 0.0415 | 0.0963 | 0.0230 | 0.1295 | 0.0411 |
| AKG_349 (M3) | 0.0000 | 0.0030 | 0.0000 | 0.0030 | 0.0000 | 0.0030 | 0.0000 | 0.0030 | 0.0000 | 0.0030 | 0.0009 | 0.0030 | 0.0000 | 0.0035 | 0.0044 | 0.0030 |
| AKG_350 (M4) | 0.0000 | 0.0030 | 0.0052 | 0.0052 | 0.0006 | 0.0030 | 0.0000 | 0.0030 | 0.0133 | 0.0120 | 0.0115 | 0.0089 | 0.0000 | 0.0046 | 0.0078 | 0.0030 |
| AKG_351 (M5) | 0.0000 | 0.0030 | 0.0000 | 0.0030 | 0.0000 | 0.0030 | 0.0000 | 0.0030 | 0.0000 | 0.0030 | 0.0000 | 0.0030 | 0.0000 | 0.0030 | 0.0000 | 0.0030 |
| Suc_289 (M0) | 1.0000 | 0.0030 | 0.9782 | 0.0216 | 0.9780 | 0.0147 | 0.9996 | 0.0196 | 0.9842 | 0.0226 | 0.9170 | 0.0126 | 0.9259 | 0.0276 | 0.8833 | 0.0102 |
| Suc_290 (M1) | 0.0000 | 0.0030 | 0.0164 | 0.0164 | 0.0000 | 0.0030 | 0.0000 | 0.0030 | 0.0000 | 0.0039 | 0.0316 | 0.0183 | 0.0185 | 0.0054 | 0.0227 | 0.0095 |
| Suc_291 (M2) | 0.0000 | 0.0030 | 0.0000 | 0.0030 | 0.0220 | 0.0152 | 0.0004 | 0.0179 | 0.0122 | 0.0212 | 0.0514 | 0.0030 | 0.0402 | 0.0313 | 0.0940 | 0.0087 |
| Suc_292 (M3) | 0.0000 | 0.0030 | 0.0000 | 0.0030 | 0.0000 | 0.0030 | 0.0000 | 0.0030 | 0.0000 | 0.0030 | 0.0000 | 0.0030 | 0.0000 | 0.0030 | 0.0000 | 0.0047 |
| Suc_293 (M4) | 0.0000 | 0.0030 | 0.0054 | 0.0054 | 0.0000 | 0.0030 | 0.0000 | 0.0030 | 0.0036 | 0.0030 | 0.0000 | 0.0030 | 0.0154 | 0.0122 | 0.0000 | 0.0047 |
| Fum_287 (M0) | 1.0000 | 0.0030 | 0.9542 | 0.0113 | 0.9272 | 0.0174 | 0.9119 | 0.0202 | 0.8914 | 0.0229 | 0.8517 | 0.0303 | 0.8118 | 0.0338 | 0.8175 | 0.0030 |
| Fum_288 (M1) | 0.0000 | 0.0030 | 0.0000 | 0.0030 | 0.0000 | 0.0030 | 0.0000 | 0.0041 | 0.0089 | 0.0030 | 0.0101 | 0.0056 | 0.0236 | 0.0030 | 0.0152 | 0.0175 |
| Fum_289 (M2) | 0.0000 | 0.0030 | 0.0306 | 0.0030 | 0.0661 | 0.0135 | 0.0818 | 0.0183 | 0.0926 | 0.0151 | 0.1306 | 0.0309 | 0.1431 | 0.0194 | 0.1449 | 0.0048 |
| Fum_290 (M3) | 0.0000 | 0.0030 | 0.0093 | 0.0093 | 0.0044 | 0.0044 | 0.0028 | 0.0030 | 0.0071 | 0.0067 | 0.0046 | 0.0031 | 0.0157 | 0.0123 | 0.0129 | 0.0072 |
| Fum_291 (M4) | 0.0000 | 0.0030 | 0.0059 | 0.0059 | 0.0024 | 0.0030 | 0.0035 | 0.0033 | 0.0000 | 0.0030 | 0.0030 | 0.0030 | 0.0058 | 0.0037 | 0.0096 | 0.0066 |
| Mal_419 (M0) | 1.0000 | 0.0030 | 0.9798 | 0.0030 | 0.9482 | 0.0078 | 0.9331 | 0.0075 | 0.8984 | 0.0237 | 0.8525 | 0.0371 | 0.8315 | 0.0221 | 0.8323 | 0.0053 |
| Mal_420 (M1) | 0.0000 | 0.0030 | 0.0021 | 0.0030 | 0.0000 | 0.0030 | 0.0028 | 0.0030 | 0.0000 | 0.0063 | 0.0265 | 0.0117 | 0.0066 | 0.0177 | 0.0235 | 0.0083 |
| Mal_421 (M2) | 0.0000 | 0.0030 | 0.0153 | 0.0061 | 0.0518 | 0.0100 | 0.0641 | 0.0085 | 0.0972 | 0.0264 | 0.1149 | 0.0214 | 0.1551 | 0.0382 | 0.1310 | 0.0030 |
| Mal_422 (M3) | 0.0000 | 0.0030 | 0.0028 | 0.0030 | 0.0000 | 0.0030 | 0.0000 | 0.0030 | 0.0000 | 0.0030 | 0.0003 | 0.0030 | 0.0000 | 0.0033 | 0.0077 | 0.0030 |
| Mal_423 (M4) | 0.0000 | 0.0030 | 0.0000 | 0.0030 | 0.0000 | 0.0030 | 0.0000 | 0.0030 | 0.0044 | 0.0039 | 0.0059 | 0.0048 | 0.0067 | 0.0049 | 0.0056 | 0.0030 |
| Asp_418 (M0) | 1.0000 | 0.0030 | 0.9891 | 0.0030 | 0.9680 | 0.0115 | 0.9634 | 0.0043 | 0.9529 | 0.0030 | 0.9120 | 0.0061 | 0.8907 | 0.0082 | 0.8665 | 0.0076 |
| Asp_419 (M1) | 0.0000 | 0.0030 | 0.0019 | 0.0030 | 0.0058 | 0.0048 | 0.0164 | 0.0146 | 0.0168 | 0.0131 | 0.0142 | 0.0040 | 0.0261 | 0.0068 | 0.0321 | 0.0063 |
| Asp_420 (M2) | 0.0000 | 0.0030 | 0.0090 | 0.0030 | 0.0262 | 0.0067 | 0.0119 | 0.0184 | 0.0259 | 0.0189 | 0.0725 | 0.0030 | 0.0794 | 0.0148 | 0.0924 | 0.0162 |

|              |        |        |        |        |        |        |        |        |        |        |        |        |        |        |        |        |
|--------------|--------|--------|--------|--------|--------|--------|--------|--------|--------|--------|--------|--------|--------|--------|--------|--------|
| Asp_421 (M3) | 0.0000 | 0.0030 | 0.0000 | 0.0030 | 0.0000 | 0.0030 | 0.0065 | 0.0064 | 0.0000 | 0.0030 | 0.0002 | 0.0030 | 0.0038 | 0.0030 | 0.0053 | 0.0030 |
| Asp_422 (M4) | 0.0000 | 0.0030 | 0.0000 | 0.0030 | 0.0000 | 0.0030 | 0.0018 | 0.0030 | 0.0044 | 0.0041 | 0.0012 | 0.0030 | 0.0000 | 0.0030 | 0.0036 | 0.0030 |
| Glu_432 (M0) | 1.0000 | 0.0030 | 0.9997 | 0.0030 | 0.9835 | 0.0062 | 0.9769 | 0.0030 | 0.9462 | 0.0128 | 0.8965 | 0.0329 | 0.8855 | 0.0134 | 0.8305 | 0.0421 |
| Glu_433 (M1) | 0.0000 | 0.0030 | 0.0000 | 0.0030 | 0.0038 | 0.0033 | 0.0036 | 0.0030 | 0.0085 | 0.0046 | 0.0203 | 0.0091 | 0.0136 | 0.0061 | 0.0320 | 0.0055 |
| Glu_434 (M2) | 0.0000 | 0.0030 | 0.0000 | 0.0030 | 0.0111 | 0.0030 | 0.0173 | 0.0039 | 0.0381 | 0.0030 | 0.0717 | 0.0164 | 0.0851 | 0.0118 | 0.1153 | 0.0268 |
| Glu_435 (M3) | 0.0000 | 0.0030 | 0.0000 | 0.0030 | 0.0009 | 0.0030 | 0.0017 | 0.0030 | 0.0033 | 0.0030 | 0.0058 | 0.0042 | 0.0053 | 0.0030 | 0.0109 | 0.0052 |
| Glu_436 (M4) | 0.0000 | 0.0030 | 0.0001 | 0.0030 | 0.0005 | 0.0030 | 0.0005 | 0.0030 | 0.0032 | 0.0030 | 0.0026 | 0.0030 | 0.0062 | 0.0030 | 0.0087 | 0.0030 |
| Glu_437 (M5) | 0.0000 | 0.0030 | 0.0002 | 0.0030 | 0.0000 | 0.0030 | 0.0001 | 0.0030 | 0.0006 | 0.0030 | 0.0031 | 0.0031 | 0.0044 | 0.0043 | 0.0025 | 0.0030 |
| Gln_431 (M0) | 1.0000 | 0.0030 | 1.0000 | 0.0030 | 0.9996 | 0.0030 | 0.9987 | 0.0030 | 0.9971 | 0.0030 | 0.9943 | 0.0057 | 0.9822 | 0.0178 | 0.9976 | 0.0030 |
| Gln_432 (M1) | 0.0000 | 0.0030 | 0.0000 | 0.0030 | 0.0000 | 0.0030 | 0.0000 | 0.0030 | 0.0000 | 0.0030 | 0.0000 | 0.0030 | 0.0120 | 0.0120 | 0.0000 | 0.0030 |
| Gln_433 (M2) | 0.0000 | 0.0030 | 0.0000 | 0.0030 | 0.0000 | 0.0030 | 0.0000 | 0.0030 | 0.0000 | 0.0030 | 0.0000 | 0.0030 | 0.0000 | 0.0030 | 0.0024 | 0.0030 |
| Gln_434 (M3) | 0.0000 | 0.0030 | 0.0000 | 0.0030 | 0.0000 | 0.0030 | 0.0000 | 0.0030 | 0.0018 | 0.0030 | 0.0048 | 0.0048 | 0.0000 | 0.0030 | 0.0000 | 0.0030 |
| Gln_435 (M4) | 0.0000 | 0.0030 | 0.0000 | 0.0030 | 0.0000 | 0.0030 | 0.0000 | 0.0030 | 0.0000 | 0.0030 | 0.0000 | 0.0030 | 0.0000 | 0.0030 | 0.0000 | 0.0030 |
| Gln_436 (M5) | 0.0000 | 0.0030 | 0.0000 | 0.0030 | 0.0004 | 0.0030 | 0.0013 | 0.0030 | 0.0011 | 0.0030 | 0.0009 | 0.0030 | 0.0058 | 0.0058 | 0.0000 | 0.0030 |
| Ser_390 (M0) | 1.0000 | 0.0030 | 0.9931 | 0.0052 | 0.9655 | 0.0140 | 0.9641 | 0.0030 | 0.9631 | 0.0168 | 0.9348 | 0.0072 | 0.9120 | 0.0076 | 0.8705 | 0.0199 |
| Ser_391 (M1) | 0.0000 | 0.0030 | 0.0000 | 0.0030 | 0.0110 | 0.0076 | 0.0152 | 0.0042 | 0.0129 | 0.0080 | 0.0273 | 0.0063 | 0.0416 | 0.0059 | 0.0680 | 0.0125 |
| Ser_392 (M2) | 0.0000 | 0.0030 | 0.0069 | 0.0053 | 0.0235 | 0.0065 | 0.0207 | 0.0065 | 0.0240 | 0.0086 | 0.0380 | 0.0030 | 0.0464 | 0.0030 | 0.0616 | 0.0090 |
| Ser_393 (M3) | 0.0000 | 0.0030 | 0.0000 | 0.0030 | 0.0000 | 0.0030 | 0.0000 | 0.0030 | 0.0000 | 0.0030 | 0.0000 | 0.0030 | 0.0000 | 0.0030 | 0.0000 | 0.0030 |
| Gly_246 (M0) | 1.0000 | 0.0030 | 0.9914 | 0.0085 | 0.9857 | 0.0133 | 0.9824 | 0.0129 | 0.9883 | 0.0030 | 0.9630 | 0.0091 | 0.9519 | 0.0045 | 0.9141 | 0.0186 |
| Gly_247 (M1) | 0.0000 | 0.0030 | 0.0000 | 0.0030 | 0.0124 | 0.0113 | 0.0167 | 0.0121 | 0.0080 | 0.0034 | 0.0370 | 0.0092 | 0.0419 | 0.0101 | 0.0818 | 0.0162 |
| Gly_248 (M2) | 0.0000 | 0.0030 | 0.0086 | 0.0086 | 0.0018 | 0.0030 | 0.0009 | 0.0030 | 0.0038 | 0.0038 | 0.0000 | 0.0030 | 0.0062 | 0.0055 | 0.0042 | 0.0030 |

Mass isotopomer distributions were corrected for natural isotope abundance. Errors were calculated as described in the supplementary text.

**Table S3** - Measured mass isotopomer distributions and calculated errors from [U-<sup>13</sup>C]glutamine under growth conditions (mock infection).

| <b>Time (h)</b> | <b>0.00</b> | <b>0.02</b> | <b>0.25</b> | <b>0.608</b> | <b>1.217</b> | <b>3</b> | <b>8</b> | <b>24</b> |        |        |        |        |        |        |        |        |
|-----------------|-------------|-------------|-------------|--------------|--------------|----------|----------|-----------|--------|--------|--------|--------|--------|--------|--------|--------|
| 3PG_459 (M0)    | 1.0000      | 0.0030      | 1.0000      | 0.0030       | 1.0000       | 0.0030   | 1.0000   | 0.0030    | 1.0000 | 0.0030 | 1.0000 | 0.0030 | 1.0000 | 0.0030 | 1.0000 | 0.0030 |
| 3PG_460 (M1)    | 0.0000      | 0.0030      | 0.0000      | 0.0030       | 0.0000       | 0.0030   | 0.0000   | 0.0030    | 0.0000 | 0.0030 | 0.0000 | 0.0030 | 0.0000 | 0.0030 | 0.0000 | 0.0030 |
| 3PG_461 (M2)    | 0.0000      | 0.0030      | 0.0000      | 0.0030       | 0.0000       | 0.0030   | 0.0000   | 0.0030    | 0.0000 | 0.0030 | 0.0000 | 0.0030 | 0.0000 | 0.0030 | 0.0000 | 0.0030 |
| 3PG_462 (M3)    | 0.0000      | 0.0030      | 0.0000      | 0.0030       | 0.0000       | 0.0030   | 0.0000   | 0.0030    | 0.0000 | 0.0030 | 0.0000 | 0.0030 | 0.0000 | 0.0030 | 0.0000 | 0.0030 |
| PEP_369 (M0)    | 1.0000      | 0.0030      | 1.0000      | 0.0030       | 1.0000       | 0.0030   | 1.0000   | 0.0030    | 1.0000 | 0.0030 | 1.0000 | 0.0030 | 1.0000 | 0.0030 | 1.0000 | 0.0030 |
| PEP_370 (M1)    | 0.0000      | 0.0030      | 0.0000      | 0.0030       | 0.0000       | 0.0030   | 0.0000   | 0.0030    | 0.0000 | 0.0030 | 0.0000 | 0.0030 | 0.0000 | 0.0030 | 0.0000 | 0.0030 |
| PEP_371 (M2)    | 0.0000      | 0.0030      | 0.0000      | 0.0030       | 0.0000       | 0.0030   | 0.0000   | 0.0030    | 0.0000 | 0.0030 | 0.0000 | 0.0030 | 0.0000 | 0.0030 | 0.0000 | 0.0030 |
| PEP_372 (M3)    | 0.0000      | 0.0030      | 0.0000      | 0.0030       | 0.0000       | 0.0030   | 0.0000   | 0.0030    | 0.0000 | 0.0030 | 0.0000 | 0.0030 | 0.0000 | 0.0030 | 0.0000 | 0.0030 |
| Lac_261 (M0)    | 1.0000      | 0.0030      | 1.0000      | 0.0030       | 1.0000       | 0.0030   | 1.0000   | 0.0037    | 1.0000 | 0.0082 | 0.9990 | 0.0138 | 0.9990 | 0.0173 | 0.9990 | 0.0195 |
| Lac_262 (M1)    | 0.0000      | 0.0030      | 0.0000      | 0.0030       | 0.0000       | 0.0030   | 0.0000   | 0.0030    | 0.0000 | 0.0030 | 0.0000 | 0.0030 | 0.0000 | 0.0030 | 0.0000 | 0.0037 |
| Lac_263 (M2)    | 0.0000      | 0.0030      | 0.0000      | 0.0030       | 0.0000       | 0.0030   | 0.0000   | 0.0030    | 0.0000 | 0.0030 | 0.0000 | 0.0030 | 0.0000 | 0.0033 | 0.0000 | 0.0038 |
| Lac_264 (M3)    | 0.0000      | 0.0030      | 0.0000      | 0.0030       | 0.0000       | 0.0030   | 0.0000   | 0.0033    | 0.0000 | 0.0067 | 0.0014 | 0.0093 | 0.0009 | 0.0111 | 0.0063 | 0.0068 |
| Lac23_233 (M0)  | 1.0000      | 0.0030      | 1.0000      | 0.0030       | 1.0000       | 0.0030   | 1.0000   | 0.0037    | 1.0000 | 0.0082 | 1.0000 | 0.0148 | 1.0000 | 0.0180 | 1.0000 | 0.0202 |
| Lac23_234 (M1)  | 0.0000      | 0.0030      | 0.0000      | 0.0030       | 0.0000       | 0.0030   | 0.0000   | 0.0030    | 0.0000 | 0.0030 | 0.0000 | 0.0030 | 0.0000 | 0.0045 | 0.0000 | 0.0054 |
| Lac23_235 (M2)  | 0.0000      | 0.0030      | 0.0000      | 0.0030       | 0.0000       | 0.0030   | 0.0000   | 0.0037    | 0.0000 | 0.0075 | 0.0000 | 0.0119 | 0.0000 | 0.0135 | 0.0000 | 0.0147 |
| Ala_260 (M0)    | 1.0000      | 0.0030      | 1.0000      | 0.0030       | 1.0000       | 0.0030   | 1.0000   | 0.0030    | 1.0000 | 0.0030 | 1.0000 | 0.0081 | 1.0000 | 0.0115 | 1.0000 | 0.0130 |
| Ala_261 (M1)    | 0.0000      | 0.0030      | 0.0000      | 0.0030       | 0.0000       | 0.0030   | 0.0000   | 0.0030    | 0.0000 | 0.0030 | 0.0000 | 0.0030 | 0.0000 | 0.0030 | 0.0000 | 0.0030 |
| Ala_262 (M2)    | 0.0000      | 0.0030      | 0.0000      | 0.0030       | 0.0000       | 0.0030   | 0.0000   | 0.0030    | 0.0000 | 0.0030 | 0.0000 | 0.0030 | 0.0000 | 0.0030 | 0.0000 | 0.0030 |
| Ala_263 (M3)    | 0.0000      | 0.0030      | 0.0000      | 0.0030       | 0.0000       | 0.0030   | 0.0000   | 0.0030    | 0.0000 | 0.0030 | 0.0000 | 0.0061 | 0.0000 | 0.0076 | 0.0000 | 0.0083 |
| Ala23_232 (M0)  | 1.0000      | 0.0030      | -           | -            | -            | -        | 0.9825   | 0.0167    | 0.9926 | 0.0047 | 0.9620 | 0.0300 | 0.9808 | 0.0078 | 0.9716 | 0.0155 |
| Ala23_233 (M1)  | 0.0000      | 0.0030      | -           | -            | -            | -        | 0.0000   | 0.0030    | 0.0000 | 0.0030 | 0.0071 | 0.0058 | 0.0000 | 0.0030 | 0.0023 | 0.0030 |
| Ala23_234 (M2)  | 0.0000      | 0.0030      | -           | -            | -            | -        | 0.0175   | 0.0167    | 0.0074 | 0.0048 | 0.0309 | 0.0241 | 0.0192 | 0.0106 | 0.0261 | 0.0167 |
| Cit_591 (M0)    | 1.0000      | 0.0030      | 0.9776      | 0.0221       | 0.9749       | 0.0056   | 0.9330   | 0.0102    | 0.8308 | 0.0117 | 0.6269 | 0.0283 | 0.6201 | 0.0481 | 0.5443 | 0.0250 |
| Cit_592 (M1)    | 0.0000      | 0.0030      | 0.0156      | 0.0156       | 0.0000       | 0.0030   | 0.0000   | 0.0030    | 0.0000 | 0.0030 | 0.0000 | 0.0169 | 0.0055 | 0.0307 | 0.0305 | 0.0151 |
| Cit_593 (M2)    | 0.0000      | 0.0030      | 0.0000      | 0.0030       | 0.0000       | 0.0030   | 0.0000   | 0.0103    | 0.0002 | 0.0290 | 0.0852 | 0.0163 | 0.0860 | 0.0043 | 0.1131 | 0.0115 |

|              |        |        |        |        |        |        |        |        |        |        |        |        |        |        |        |        |
|--------------|--------|--------|--------|--------|--------|--------|--------|--------|--------|--------|--------|--------|--------|--------|--------|--------|
| Cit_594 (M3) | 0.0000 | 0.0030 | 0.0056 | 0.0056 | 0.0000 | 0.0030 | 0.0226 | 0.0154 | 0.0491 | 0.0290 | 0.0635 | 0.0205 | 0.0737 | 0.0184 | 0.0881 | 0.0246 |
| Cit_595 (M4) | 0.0000 | 0.0030 | 0.0000 | 0.0030 | 0.0000 | 0.0062 | 0.0361 | 0.0047 | 0.0772 | 0.0030 | 0.1310 | 0.0031 | 0.1345 | 0.0175 | 0.1525 | 0.0129 |
| Cit_596 (M5) | 0.0000 | 0.0030 | 0.0000 | 0.0030 | 0.0151 | 0.0050 | 0.0013 | 0.0262 | 0.0428 | 0.0067 | 0.0934 | 0.0189 | 0.0801 | 0.0044 | 0.0715 | 0.0215 |
| Cit_597 (M6) | 0.0000 | 0.0030 | 0.0013 | 0.0030 | 0.0100 | 0.0100 | 0.0069 | 0.0065 | 0.0000 | 0.0030 | 0.0000 | 0.0074 | 0.0000 | 0.0096 | 0.0000 | 0.0115 |
| AKG_346 (M0) | 1.0000 | 0.0030 | 0.9752 | 0.0210 | 0.8610 | 0.0610 | 0.8588 | 0.0279 | 0.7188 | 0.0036 | 0.5101 | 0.0600 | 0.5006 | 0.0167 | 0.4203 | 0.0030 |
| AKG_347 (M1) | 0.0000 | 0.0030 | 0.0000 | 0.0030 | 0.0466 | 0.0466 | 0.0000 | 0.0030 | 0.0000 | 0.0030 | 0.0159 | 0.0062 | 0.0002 | 0.0243 | 0.0154 | 0.0177 |
| AKG_348 (M2) | 0.0000 | 0.0030 | 0.0000 | 0.0030 | 0.0000 | 0.0030 | 0.0000 | 0.0030 | 0.0074 | 0.0030 | 0.0272 | 0.0030 | 0.0374 | 0.0030 | 0.0521 | 0.0062 |
| AKG_349 (M3) | 0.0000 | 0.0030 | 0.0064 | 0.0064 | 0.0000 | 0.0030 | 0.0069 | 0.0030 | 0.0219 | 0.0030 | 0.0856 | 0.0259 | 0.1011 | 0.0177 | 0.1138 | 0.0144 |
| AKG_350 (M4) | 0.0000 | 0.0030 | 0.0000 | 0.0030 | 0.0000 | 0.0030 | 0.0076 | 0.0076 | 0.0106 | 0.0105 | 0.0151 | 0.0138 | 0.0042 | 0.0030 | 0.0020 | 0.0030 |
| AKG_351 (M5) | 0.0000 | 0.0030 | 0.0184 | 0.0147 | 0.0924 | 0.0151 | 0.1267 | 0.0353 | 0.2413 | 0.0072 | 0.3461 | 0.0117 | 0.3566 | 0.0107 | 0.3964 | 0.0032 |
| Suc_289 (M0) | 1.0000 | 0.0030 | 0.9377 | 0.0623 | 0.9182 | 0.0572 | 0.8741 | 0.0289 | 0.8301 | 0.0402 | 0.6306 | 0.0092 | 0.6033 | 0.0714 | 0.4735 | 0.0030 |
| Suc_290 (M1) | 0.0000 | 0.0030 | 0.0000 | 0.0030 | 0.0364 | 0.0364 | 0.0398 | 0.0398 | 0.0434 | 0.0425 | 0.0343 | 0.0225 | 0.0211 | 0.0108 | 0.0407 | 0.0030 |
| Suc_291 (M2) | 0.0000 | 0.0030 | 0.0190 | 0.0190 | 0.0000 | 0.0030 | 0.0240 | 0.0212 | 0.0000 | 0.0170 | 0.0796 | 0.0129 | 0.1072 | 0.0093 | 0.1489 | 0.0330 |
| Suc_292 (M3) | 0.0000 | 0.0030 | 0.0355 | 0.0355 | 0.0000 | 0.0030 | 0.0000 | 0.0030 | 0.0000 | 0.0030 | 0.0000 | 0.0062 | 0.0000 | 0.0094 | 0.0000 | 0.0117 |
| Suc_293 (M4) | 0.0000 | 0.0030 | 0.0078 | 0.0077 | 0.0454 | 0.0212 | 0.0620 | 0.0312 | 0.1265 | 0.0630 | 0.2555 | 0.0383 | 0.2683 | 0.0605 | 0.3369 | 0.0218 |
| Fum_287 (M0) | 1.0000 | 0.0030 | 0.9273 | 0.0727 | 0.8891 | 0.0931 | 0.8983 | 0.0304 | 0.8095 | 0.0338 | 0.6299 | 0.0849 | 0.6183 | 0.0285 | 0.5164 | 0.0847 |
| Fum_288 (M1) | 0.0000 | 0.0030 | 0.0000 | 0.0030 | 0.0000 | 0.0030 | 0.0000 | 0.0030 | 0.0000 | 0.0030 | 0.0282 | 0.0156 | 0.0133 | 0.0158 | 0.0430 | 0.0050 |
| Fum_289 (M2) | 0.0000 | 0.0030 | 0.0586 | 0.0586 | 0.0441 | 0.0438 | 0.0311 | 0.0282 | 0.0457 | 0.0322 | 0.0980 | 0.0492 | 0.1057 | 0.0347 | 0.1183 | 0.0345 |
| Fum_290 (M3) | 0.0000 | 0.0030 | 0.0000 | 0.0030 | 0.0139 | 0.0110 | 0.0132 | 0.0030 | 0.0410 | 0.0160 | 0.0698 | 0.0283 | 0.0773 | 0.0287 | 0.1070 | 0.0529 |
| Fum_291 (M4) | 0.0000 | 0.0030 | 0.0141 | 0.0141 | 0.0529 | 0.0384 | 0.0574 | 0.0030 | 0.1038 | 0.0127 | 0.1741 | 0.0082 | 0.1854 | 0.0191 | 0.2154 | 0.0076 |
| Mal_419 (M0) | 1.0000 | 0.0030 | 0.9640 | 0.0359 | 0.9625 | 0.0227 | 0.9369 | 0.0030 | 0.8155 | 0.0322 | 0.6445 | 0.0647 | 0.6228 | 0.0135 | 0.5204 | 0.0684 |
| Mal_420 (M1) | 0.0000 | 0.0030 | 0.0205 | 0.0205 | 0.0000 | 0.0030 | 0.0000 | 0.0030 | 0.0000 | 0.0030 | 0.0207 | 0.0091 | 0.0135 | 0.0148 | 0.0435 | 0.0062 |
| Mal_421 (M2) | 0.0000 | 0.0030 | 0.0155 | 0.0155 | 0.0030 | 0.0030 | 0.0117 | 0.0095 | 0.0234 | 0.0122 | 0.0844 | 0.0396 | 0.0838 | 0.0165 | 0.1112 | 0.0316 |
| Mal_422 (M3) | 0.0000 | 0.0030 | 0.0000 | 0.0030 | 0.0000 | 0.0042 | 0.0037 | 0.0139 | 0.0492 | 0.0099 | 0.0859 | 0.0180 | 0.0917 | 0.0118 | 0.1037 | 0.0149 |
| Mal_423 (M4) | 0.0000 | 0.0030 | 0.0000 | 0.0030 | 0.0345 | 0.0242 | 0.0477 | 0.0030 | 0.1119 | 0.0115 | 0.1644 | 0.0030 | 0.1882 | 0.0030 | 0.2212 | 0.0158 |
| Asp_418 (M0) | 1.0000 | 0.0030 | 0.9919 | 0.0081 | 0.9467 | 0.0471 | 0.9616 | 0.0084 | 0.9220 | 0.0048 | 0.7343 | 0.0614 | 0.6964 | 0.0136 | 0.6665 | 0.0030 |
| Asp_419 (M1) | 0.0000 | 0.0030 | 0.0000 | 0.0030 | 0.0287 | 0.0287 | 0.0012 | 0.0030 | 0.0000 | 0.0030 | 0.0001 | 0.0070 | 0.0155 | 0.0068 | 0.0423 | 0.0122 |
| Asp_420 (M2) | 0.0000 | 0.0030 | 0.0000 | 0.0030 | 0.0086 | 0.0085 | 0.0000 | 0.0030 | 0.0097 | 0.0039 | 0.0826 | 0.0529 | 0.0684 | 0.0143 | 0.0705 | 0.0055 |

|              |        |        |        |        |        |        |        |        |        |        |        |        |        |        |        |        |
|--------------|--------|--------|--------|--------|--------|--------|--------|--------|--------|--------|--------|--------|--------|--------|--------|--------|
| Asp_421 (M3) | 0.0000 | 0.0030 | 0.0081 | 0.0081 | 0.0000 | 0.0030 | 0.0049 | 0.0030 | 0.0152 | 0.0050 | 0.0595 | 0.0139 | 0.0625 | 0.0030 | 0.0644 | 0.0031 |
| Asp_422 (M4) | 0.0000 | 0.0030 | 0.0000 | 0.0030 | 0.0160 | 0.0116 | 0.0324 | 0.0110 | 0.0531 | 0.0031 | 0.1235 | 0.0030 | 0.1573 | 0.0038 | 0.1564 | 0.0120 |
| Glu_432 (M0) | 1.0000 | 0.0030 | 0.9641 | 0.0321 | 0.8741 | 0.0480 | 0.8560 | 0.0251 | 0.7087 | 0.0135 | 0.5101 | 0.0598 | 0.4743 | 0.0094 | 0.4058 | 0.0117 |
| Glu_433 (M1) | 0.0000 | 0.0030 | 0.0132 | 0.0132 | 0.0042 | 0.0042 | 0.0012 | 0.0030 | 0.0032 | 0.0030 | 0.0184 | 0.0087 | 0.0239 | 0.0030 | 0.0399 | 0.0070 |
| Glu_434 (M2) | 0.0000 | 0.0030 | 0.0000 | 0.0030 | 0.0000 | 0.0030 | 0.0000 | 0.0030 | 0.0075 | 0.0030 | 0.0317 | 0.0067 | 0.0376 | 0.0030 | 0.0496 | 0.0037 |
| Glu_435 (M3) | 0.0000 | 0.0030 | 0.0000 | 0.0030 | 0.0012 | 0.0030 | 0.0043 | 0.0030 | 0.0296 | 0.0093 | 0.0855 | 0.0259 | 0.0920 | 0.0087 | 0.1095 | 0.0102 |
| Glu_436 (M4) | 0.0000 | 0.0030 | 0.0014 | 0.0030 | 0.0041 | 0.0041 | 0.0059 | 0.0059 | 0.0097 | 0.0096 | 0.0123 | 0.0110 | 0.0152 | 0.0120 | 0.0141 | 0.0096 |
| Glu_437 (M5) | 0.0000 | 0.0030 | 0.0214 | 0.0175 | 0.1164 | 0.0390 | 0.1326 | 0.0296 | 0.2413 | 0.0073 | 0.3420 | 0.0076 | 0.3569 | 0.0103 | 0.3811 | 0.0187 |
| Gln_431 (M0) | 1.0000 | 0.0030 | 0.3004 | 0.0125 | 0.2048 | 0.0421 | 0.2102 | 0.0367 | 0.2186 | 0.0282 | 0.1977 | 0.0491 | 0.2227 | 0.0242 | 0.2034 | 0.0434 |
| Gln_432 (M1) | 0.0000 | 0.0030 | 0.0000 | 0.0030 | 0.0014 | 0.0030 | 0.0000 | 0.0030 | 0.0000 | 0.0030 | 0.0021 | 0.0030 | 0.0000 | 0.0030 | 0.0046 | 0.0046 |
| Gln_433 (M2) | 0.0000 | 0.0030 | 0.0152 | 0.0152 | 0.0053 | 0.0053 | 0.0000 | 0.0030 | 0.0000 | 0.0030 | 0.0020 | 0.0030 | 0.0000 | 0.0030 | 0.0000 | 0.0030 |
| Gln_434 (M3) | 0.0000 | 0.0030 | 0.0056 | 0.0056 | 0.0076 | 0.0076 | 0.0038 | 0.0038 | 0.0056 | 0.0056 | 0.0092 | 0.0092 | 0.0050 | 0.0050 | 0.0086 | 0.0086 |
| Gln_435 (M4) | 0.0000 | 0.0030 | 0.0270 | 0.0270 | 0.0345 | 0.0345 | 0.0267 | 0.0267 | 0.0317 | 0.0317 | 0.0336 | 0.0336 | 0.0303 | 0.0303 | 0.0358 | 0.0358 |
| Gln_436 (M5) | 0.0000 | 0.0030 | 0.6518 | 0.0354 | 0.7465 | 0.0067 | 0.7594 | 0.0062 | 0.7441 | 0.0091 | 0.7553 | 0.0030 | 0.7421 | 0.0112 | 0.7475 | 0.0056 |
| Ser_390 (M0) | 1.0000 | 0.0030 | 1.0000 | 0.0030 | 1.0000 | 0.0030 | 1.0000 | 0.0030 | 1.0000 | 0.0030 | 1.0000 | 0.0030 | 1.0000 | 0.0030 | 1.0000 | 0.0030 |
| Ser_391 (M1) | 0.0000 | 0.0030 | 0.0000 | 0.0030 | 0.0000 | 0.0030 | 0.0000 | 0.0030 | 0.0000 | 0.0030 | 0.0000 | 0.0030 | 0.0000 | 0.0030 | 0.0000 | 0.0030 |
| Ser_392 (M2) | 0.0000 | 0.0030 | 0.0000 | 0.0030 | 0.0000 | 0.0030 | 0.0000 | 0.0030 | 0.0000 | 0.0030 | 0.0000 | 0.0030 | 0.0000 | 0.0030 | 0.0000 | 0.0030 |
| Ser_393 (M3) | 0.0000 | 0.0030 | 0.0000 | 0.0030 | 0.0000 | 0.0030 | 0.0000 | 0.0030 | 0.0000 | 0.0030 | 0.0000 | 0.0030 | 0.0000 | 0.0030 | 0.0000 | 0.0030 |
| Gly_246 (M0) | 1.0000 | 0.0030 | 1.0000 | 0.0030 | 1.0000 | 0.0030 | 1.0000 | 0.0030 | 1.0000 | 0.0030 | 1.0000 | 0.0030 | 1.0000 | 0.0030 | 1.0000 | 0.0030 |
| Gly_247 (M1) | 0.0000 | 0.0030 | 0.0000 | 0.0030 | 0.0000 | 0.0030 | 0.0000 | 0.0030 | 0.0000 | 0.0030 | 0.0000 | 0.0030 | 0.0000 | 0.0030 | 0.0000 | 0.0030 |
| Gly_248 (M2) | 0.0000 | 0.0030 | 0.0000 | 0.0030 | 0.0000 | 0.0030 | 0.0000 | 0.0030 | 0.0000 | 0.0030 | 0.0000 | 0.0030 | 0.0000 | 0.0030 | 0.0000 | 0.0030 |

Mass isotopomer distributions were corrected for natural isotope abundance. Errors were calculated as described in the supplementary text.

**Table S4** - Measured mass isotopomer distributions and calculated errors from [1,2-<sup>13</sup>C]glucose during CAV2 infection.

| <b>Time (h)</b> | <b>0.00</b> | <b>0.02</b> | <b>0.25</b> | <b>0.608</b> | <b>1.217</b> | <b>3</b> | <b>8</b> | <b>24</b> |        |        |        |        |        |        |        |        |
|-----------------|-------------|-------------|-------------|--------------|--------------|----------|----------|-----------|--------|--------|--------|--------|--------|--------|--------|--------|
| 3PG_459 (M0)    | 1.0000      | 0.0030      | 0.6798      | 0.0975       | 0.7059       | 0.0620   | -        | -         | -      | -      | 0.6800 | 0.0145 | 0.6089 | 0.0411 | 0.6849 | 0.0478 |
| 3PG_460 (M1)    | 0.0000      | 0.0030      | 0.0734      | 0.0624       | 0.0000       | 0.0117   | -        | -         | -      | -      | 0.0353 | 0.0182 | 0.0417 | 0.0214 | 0.0079 | 0.0135 |
| 3PG_461 (M2)    | 0.0000      | 0.0030      | 0.2159      | 0.0043       | 0.2729       | 0.0528   | -        | -         | -      | -      | 0.2668 | 0.0182 | 0.3136 | 0.0084 | 0.3072 | 0.0239 |
| 3PG_462 (M3)    | 0.0000      | 0.0030      | 0.0309      | 0.0309       | 0.0211       | 0.0209   | -        | -         | -      | -      | 0.0179 | 0.0143 | 0.0358 | 0.0280 | 0.0000 | 0.0103 |
| PEP_369 (M0)    | 1.0000      | 0.0030      | 0.7389      | 0.0385       | 0.7080       | 0.0600   | -        | -         | -      | -      | 0.6644 | 0.0300 | 0.6438 | 0.0061 | 0.6455 | 0.0084 |
| PEP_370 (M1)    | 0.0000      | 0.0030      | 0.0602      | 0.0491       | 0.0380       | 0.0262   | -        | -         | -      | -      | 0.0381 | 0.0210 | 0.0231 | 0.0030 | 0.0118 | 0.0097 |
| PEP_371 (M2)    | 0.0000      | 0.0030      | 0.1890      | 0.0227       | 0.2540       | 0.0340   | -        | -         | -      | -      | 0.2831 | 0.0030 | 0.2818 | 0.0402 | 0.3291 | 0.0030 |
| PEP_372 (M3)    | 0.0000      | 0.0030      | 0.0120      | 0.0120       | 0.0000       | 0.0030   | -        | -         | -      | -      | 0.0144 | 0.0109 | 0.0512 | 0.0434 | 0.0136 | 0.0033 |
| Lac_261 (M0)    | 1.0000      | 0.0030      | 0.8722      | 0.0030       | 0.8393       | 0.0046   | 0.8359   | 0.0030    | 0.8448 | 0.0245 | 0.7716 | 0.0204 | 0.7393 | 0.0216 | 0.6790 | 0.0721 |
| Lac_262 (M1)    | 0.0000      | 0.0030      | 0.0043      | 0.0030       | 0.0209       | 0.0127   | 0.0198   | 0.0107    | 0.0108 | 0.0030 | 0.0179 | 0.0048 | 0.0159 | 0.0030 | 0.0295 | 0.0121 |
| Lac_263 (M2)    | 0.0000      | 0.0030      | 0.1235      | 0.0030       | 0.1326       | 0.0151   | 0.1443   | 0.0119    | 0.1444 | 0.0238 | 0.2105 | 0.0180 | 0.2449 | 0.0270 | 0.2915 | 0.0672 |
| Lac_264 (M3)    | 0.0000      | 0.0030      | 0.0000      | 0.0030       | 0.0071       | 0.0069   | 0.0000   | 0.0030    | 0.0000 | 0.0030 | 0.0000 | 0.0030 | 0.0000 | 0.0054 | 0.0000 | 0.0071 |
| Lac23_233 (M0)  | 1.0000      | 0.0030      | 0.8703      | 0.0030       | 0.8710       | 0.0270   | 0.8490   | 0.0144    | 0.8553 | 0.0341 | 0.7715 | 0.0221 | 0.7482 | 0.0152 | 0.6894 | 0.0648 |
| Lac23_234 (M1)  | 0.0000      | 0.0030      | 0.0070      | 0.0030       | 0.0176       | 0.0094   | 0.0062   | 0.0030    | 0.0154 | 0.0051 | 0.0184 | 0.0059 | 0.0159 | 0.0030 | 0.0274 | 0.0111 |
| Lac23_235 (M2)  | 0.0000      | 0.0030      | 0.1226      | 0.0030       | 0.1114       | 0.0364   | 0.1448   | 0.0114    | 0.1293 | 0.0392 | 0.2100 | 0.0162 | 0.2359 | 0.0143 | 0.2832 | 0.0538 |
| Ala_260 (M0)    | 1.0000      | 0.0030      | 1.0000      | 0.0129       | 0.8665       | 0.0469   | 0.9391   | 0.0323    | 0.9234 | 0.0246 | 0.8948 | 0.0123 | 0.8812 | 0.0165 | 0.7887 | 0.0704 |
| Ala_261 (M1)    | 0.0000      | 0.0030      | 0.0000      | 0.0030       | 0.0300       | 0.0255   | 0.0000   | 0.0051    | 0.0000 | 0.0059 | 0.0000 | 0.0074 | 0.0000 | 0.0091 | 0.0000 | 0.0099 |
| Ala_262 (M2)    | 0.0000      | 0.0030      | 0.0000      | 0.0123       | 0.0855       | 0.0034   | 0.0609   | 0.0269    | 0.0766 | 0.0181 | 0.1052 | 0.0035 | 0.1188 | 0.0045 | 0.2113 | 0.0843 |
| Ala_263 (M3)    | 0.0000      | 0.0030      | 0.0000      | 0.0030       | 0.0180       | 0.0179   | 0.0000   | 0.0030    | 0.0000 | 0.0030 | 0.0000 | 0.0030 | 0.0000 | 0.0031 | 0.0000 | 0.0041 |
| Ala23_232 (M0)  | 1.0000      | 0.0030      | 0.9666      | 0.0204       | 0.8503       | 0.0631   | 0.9299   | 0.0228    | 0.9329 | 0.0336 | 0.8858 | 0.0030 | 0.8416 | 0.0245 | 0.7685 | 0.0924 |
| Ala23_233 (M1)  | 0.0000      | 0.0030      | 0.0000      | 0.0030       | 0.0549       | 0.0504   | 0.0000   | 0.0051    | 0.0000 | 0.0058 | 0.0000 | 0.0071 | 0.0063 | 0.0030 | 0.0087 | 0.0030 |
| Ala23_234 (M2)  | 0.0000      | 0.0030      | 0.0334      | 0.0212       | 0.0949       | 0.0128   | 0.0701   | 0.0177    | 0.0671 | 0.0279 | 0.1142 | 0.0047 | 0.1521 | 0.0266 | 0.2228 | 0.0928 |
| Cit_591 (M0)    | 1.0000      | 0.0030      | 0.9686      | 0.0245       | 0.9267       | 0.0169   | 0.8790   | 0.0207    | 0.8553 | 0.0030 | 0.7910 | 0.0112 | 0.7496 | 0.0030 | 0.6764 | 0.0464 |
| Cit_592 (M1)    | 0.0000      | 0.0030      | 0.0000      | 0.0030       | 0.0000       | 0.0036   | 0.0000   | 0.0075    | 0.0000 | 0.0132 | 0.0083 | 0.0162 | 0.0244 | 0.0116 | 0.0210 | 0.0244 |
| Cit_593 (M2)    | 0.0000      | 0.0030      | 0.0087      | 0.0030       | 0.0498       | 0.0030   | 0.1053   | 0.0171    | 0.1364 | 0.0153 | 0.1440 | 0.0137 | 0.1987 | 0.0122 | 0.2404 | 0.0416 |

|              |        |        |        |        |        |        |        |        |        |        |        |        |        |        |        |        |
|--------------|--------|--------|--------|--------|--------|--------|--------|--------|--------|--------|--------|--------|--------|--------|--------|--------|
| Cit_594 (M3) | 0.0000 | 0.0030 | 0.0200 | 0.0200 | 0.0011 | 0.0030 | 0.0000 | 0.0030 | 0.0000 | 0.0030 | 0.0277 | 0.0232 | 0.0020 | 0.0069 | 0.0354 | 0.0229 |
| Cit_595 (M4) | 0.0000 | 0.0030 | 0.0000 | 0.0030 | 0.0027 | 0.0030 | 0.0139 | 0.0102 | 0.0000 | 0.0062 | 0.0290 | 0.0181 | 0.0215 | 0.0052 | 0.0199 | 0.0030 |
| Cit_596 (M5) | 0.0000 | 0.0030 | 0.0000 | 0.0030 | 0.0197 | 0.0197 | 0.0000 | 0.0030 | 0.0000 | 0.0030 | 0.0000 | 0.0030 | 0.0009 | 0.0030 | 0.0011 | 0.0030 |
| Cit_597 (M6) | 0.0000 | 0.0030 | 0.0027 | 0.0030 | 0.0000 | 0.0030 | 0.0017 | 0.0030 | 0.0083 | 0.0082 | 0.0000 | 0.0030 | 0.0028 | 0.0030 | 0.0057 | 0.0053 |
| AKG_346 (M0) | 1.0000 | 0.0030 | 0.9981 | 0.0030 | 0.9807 | 0.0038 | 0.9762 | 0.0059 | 0.9406 | 0.0113 | 0.9143 | 0.0065 | 0.8944 | 0.0079 | 0.8610 | 0.0030 |
| AKG_347 (M1) | 0.0000 | 0.0030 | 0.0000 | 0.0030 | 0.0000 | 0.0030 | 0.0000 | 0.0030 | 0.0000 | 0.0060 | 0.0000 | 0.0130 | 0.0000 | 0.0216 | 0.0000 | 0.0299 |
| AKG_348 (M2) | 0.0000 | 0.0030 | 0.0019 | 0.0030 | 0.0000 | 0.0137 | 0.0238 | 0.0030 | 0.0446 | 0.0051 | 0.0788 | 0.0181 | 0.0960 | 0.0147 | 0.1255 | 0.0288 |
| AKG_349 (M3) | 0.0000 | 0.0030 | 0.0000 | 0.0030 | 0.0000 | 0.0030 | 0.0000 | 0.0030 | 0.0005 | 0.0030 | 0.0069 | 0.0047 | 0.0027 | 0.0030 | 0.0046 | 0.0030 |
| AKG_350 (M4) | 0.0000 | 0.0030 | 0.0000 | 0.0030 | 0.0084 | 0.0079 | 0.0000 | 0.0030 | 0.0143 | 0.0126 | 0.0000 | 0.0033 | 0.0069 | 0.0030 | 0.0089 | 0.0030 |
| AKG_351 (M5) | 0.0000 | 0.0030 | 0.0000 | 0.0030 | 0.0109 | 0.0109 | 0.0000 | 0.0030 | 0.0000 | 0.0030 | 0.0000 | 0.0030 | 0.0000 | 0.0030 | 0.0000 | 0.0030 |
| Suc_289 (M0) | 1.0000 | 0.0030 | 1.0000 | 0.0094 | 0.9670 | 0.0062 | -      | -      | 0.9523 | 0.0095 | 0.9337 | 0.0202 | 0.8970 | 0.0150 | 0.8943 | 0.0368 |
| Suc_290 (M1) | 0.0000 | 0.0030 | 0.0000 | 0.0030 | 0.0112 | 0.0091 | -      | -      | 0.0170 | 0.0092 | 0.0015 | 0.0146 | 0.0243 | 0.0030 | 0.0239 | 0.0114 |
| Suc_291 (M2) | 0.0000 | 0.0030 | 0.0000 | 0.0089 | 0.0218 | 0.0030 | -      | -      | 0.0275 | 0.0198 | 0.0584 | 0.0075 | 0.0778 | 0.0063 | 0.0819 | 0.0144 |
| Suc_292 (M3) | 0.0000 | 0.0030 | 0.0000 | 0.0030 | 0.0000 | 0.0030 | -      | -      | 0.0000 | 0.0030 | 0.0000 | 0.0030 | 0.0000 | 0.0041 | 0.0000 | 0.0061 |
| Suc_293 (M4) | 0.0000 | 0.0030 | 0.0000 | 0.0030 | 0.0000 | 0.0030 | -      | -      | 0.0032 | 0.0030 | 0.0064 | 0.0041 | 0.0009 | 0.0030 | 0.0000 | 0.0049 |
| Fum_287 (M0) | 1.0000 | 0.0030 | 0.9627 | 0.0088 | 0.8952 | 0.0458 | 0.9031 | 0.0239 | 0.8711 | 0.0377 | 0.8424 | 0.0351 | 0.8321 | 0.0115 | 0.8202 | 0.0030 |
| Fum_288 (M1) | 0.0000 | 0.0030 | 0.0000 | 0.0030 | 0.0000 | 0.0040 | 0.0000 | 0.0062 | 0.0071 | 0.0030 | 0.0175 | 0.0030 | 0.0112 | 0.0157 | 0.0249 | 0.0101 |
| Fum_289 (M2) | 0.0000 | 0.0030 | 0.0287 | 0.0030 | 0.0993 | 0.0446 | 0.0894 | 0.0234 | 0.0930 | 0.0136 | 0.1271 | 0.0262 | 0.1448 | 0.0226 | 0.1374 | 0.0040 |
| Fum_290 (M3) | 0.0000 | 0.0030 | 0.0086 | 0.0086 | 0.0056 | 0.0055 | 0.0075 | 0.0071 | 0.0227 | 0.0219 | 0.0029 | 0.0030 | 0.0044 | 0.0030 | 0.0092 | 0.0030 |
| Fum_291 (M4) | 0.0000 | 0.0030 | 0.0000 | 0.0030 | 0.0000 | 0.0030 | 0.0000 | 0.0030 | 0.0060 | 0.0052 | 0.0100 | 0.0085 | 0.0075 | 0.0049 | 0.0083 | 0.0049 |
| Mal_419 (M0) | 1.0000 | 0.0030 | 0.9879 | 0.0030 | 0.8931 | 0.0628 | 0.9389 | 0.0030 | 0.8527 | 0.0676 | 0.8462 | 0.0414 | 0.8118 | 0.0420 | 0.8378 | 0.0060 |
| Mal_420 (M1) | 0.0000 | 0.0030 | 0.0000 | 0.0030 | 0.0492 | 0.0463 | 0.0000 | 0.0050 | 0.0580 | 0.0496 | 0.0406 | 0.0242 | 0.0563 | 0.0306 | 0.0276 | 0.0064 |
| Mal_421 (M2) | 0.0000 | 0.0030 | 0.0086 | 0.0030 | 0.0345 | 0.0064 | 0.0611 | 0.0066 | 0.0893 | 0.0195 | 0.1101 | 0.0176 | 0.1199 | 0.0061 | 0.1243 | 0.0030 |
| Mal_422 (M3) | 0.0000 | 0.0030 | 0.0035 | 0.0035 | 0.0121 | 0.0120 | 0.0000 | 0.0030 | 0.0000 | 0.0030 | 0.0004 | 0.0030 | 0.0041 | 0.0030 | 0.0036 | 0.0030 |
| Mal_423 (M4) | 0.0000 | 0.0030 | 0.0000 | 0.0030 | 0.0111 | 0.0109 | 0.0000 | 0.0030 | 0.0000 | 0.0030 | 0.0026 | 0.0030 | 0.0078 | 0.0054 | 0.0067 | 0.0036 |
| Asp_418 (M0) | 1.0000 | 0.0030 | 0.9862 | 0.0030 | 0.9621 | 0.0104 | 0.9513 | 0.0096 | 0.9644 | 0.0194 | 0.8965 | 0.0184 | 0.9008 | 0.0200 | 0.9063 | 0.0460 |
| Asp_419 (M1) | 0.0000 | 0.0030 | 0.0000 | 0.0030 | 0.0000 | 0.0030 | 0.0000 | 0.0032 | 0.0000 | 0.0057 | 0.0190 | 0.0069 | 0.0258 | 0.0050 | 0.0124 | 0.0157 |
| Asp_420 (M2) | 0.0000 | 0.0030 | 0.0138 | 0.0034 | 0.0379 | 0.0125 | 0.0487 | 0.0132 | 0.0304 | 0.0178 | 0.0845 | 0.0139 | 0.0705 | 0.0226 | 0.0756 | 0.0283 |



|              |        |        |        |        |        |        |        |        |        |        |        |        |        |        |        |        |
|--------------|--------|--------|--------|--------|--------|--------|--------|--------|--------|--------|--------|--------|--------|--------|--------|--------|
| Asp_421 (M3) | 0.0000 | 0.0030 | 0.0000 | 0.0030 | 0.0000 | 0.0030 | 0.0000 | 0.0030 | 0.0052 | 0.0047 | 0.0000 | 0.0030 | 0.0000 | 0.0035 | 0.0052 | 0.0030 |
| Asp_422 (M4) | 0.0000 | 0.0030 | 0.0000 | 0.0030 | 0.0000 | 0.0030 | 0.0000 | 0.0030 | 0.0000 | 0.0030 | 0.0000 | 0.0030 | 0.0029 | 0.0030 | 0.0005 | 0.0030 |
| Glu_432 (M0) | 1.0000 | 0.0030 | 0.9980 | 0.0030 | 0.9669 | 0.0228 | 0.9726 | 0.0032 | 0.9458 | 0.0119 | 0.9014 | 0.0256 | 0.8723 | 0.0211 | 0.8361 | 0.0289 |
| Glu_433 (M1) | 0.0000 | 0.0030 | 0.0011 | 0.0030 | 0.0161 | 0.0153 | 0.0071 | 0.0048 | 0.0027 | 0.0030 | 0.0174 | 0.0055 | 0.0259 | 0.0057 | 0.0324 | 0.0039 |
| Glu_434 (M2) | 0.0000 | 0.0030 | 0.0000 | 0.0030 | 0.0139 | 0.0048 | 0.0161 | 0.0048 | 0.0459 | 0.0109 | 0.0695 | 0.0134 | 0.0839 | 0.0073 | 0.1130 | 0.0209 |
| Glu_435 (M3) | 0.0000 | 0.0030 | 0.0000 | 0.0030 | 0.0000 | 0.0030 | 0.0018 | 0.0030 | 0.0011 | 0.0030 | 0.0032 | 0.0030 | 0.0064 | 0.0030 | 0.0080 | 0.0030 |
| Glu_436 (M4) | 0.0000 | 0.0030 | 0.0009 | 0.0030 | 0.0014 | 0.0030 | 0.0010 | 0.0030 | 0.0019 | 0.0030 | 0.0068 | 0.0037 | 0.0089 | 0.0036 | 0.0080 | 0.0030 |
| Glu_437 (M5) | 0.0000 | 0.0030 | 0.0000 | 0.0030 | 0.0016 | 0.0030 | 0.0014 | 0.0030 | 0.0026 | 0.0030 | 0.0018 | 0.0030 | 0.0027 | 0.0030 | 0.0025 | 0.0030 |
| Gln_431 (M0) | 1.0000 | 0.0030 | 0.9924 | 0.0076 | 0.9932 | 0.0068 | 0.9906 | 0.0094 | 0.9951 | 0.0049 | 1.0000 | 0.0030 | 0.9922 | 0.0078 | 0.9948 | 0.0052 |
| Gln_432 (M1) | 0.0000 | 0.0030 | 0.0000 | 0.0030 | 0.0000 | 0.0030 | 0.0000 | 0.0030 | 0.0000 | 0.0030 | 0.0000 | 0.0030 | 0.0000 | 0.0030 | 0.0000 | 0.0030 |
| Gln_433 (M2) | 0.0000 | 0.0030 | 0.0000 | 0.0030 | 0.0000 | 0.0030 | 0.0000 | 0.0030 | 0.0000 | 0.0030 | 0.0000 | 0.0030 | 0.0000 | 0.0030 | 0.0024 | 0.0030 |
| Gln_434 (M3) | 0.0000 | 0.0030 | 0.0030 | 0.0030 | 0.0000 | 0.0030 | 0.0010 | 0.0030 | 0.0000 | 0.0030 | 0.0000 | 0.0030 | 0.0000 | 0.0030 | 0.0000 | 0.0030 |
| Gln_435 (M4) | 0.0000 | 0.0030 | 0.0000 | 0.0030 | 0.0006 | 0.0030 | 0.0000 | 0.0030 | 0.0000 | 0.0030 | 0.0000 | 0.0030 | 0.0018 | 0.0030 | 0.0000 | 0.0030 |
| Gln_436 (M5) | 0.0000 | 0.0030 | 0.0046 | 0.0046 | 0.0062 | 0.0062 | 0.0084 | 0.0084 | 0.0049 | 0.0049 | 0.0000 | 0.0030 | 0.0061 | 0.0061 | 0.0028 | 0.0030 |
| Ser_390 (M0) | 1.0000 | 0.0030 | 0.9870 | 0.0038 | 0.9437 | 0.0091 | 0.9440 | 0.0040 | 0.9681 | 0.0252 | 0.9328 | 0.0030 | 0.9231 | 0.0107 | 0.8560 | 0.0328 |
| Ser_391 (M1) | 0.0000 | 0.0030 | 0.0061 | 0.0055 | 0.0247 | 0.0074 | 0.0262 | 0.0062 | 0.0113 | 0.0112 | 0.0308 | 0.0030 | 0.0267 | 0.0143 | 0.0762 | 0.0144 |
| Ser_392 (M2) | 0.0000 | 0.0030 | 0.0070 | 0.0030 | 0.0315 | 0.0030 | 0.0293 | 0.0030 | 0.0206 | 0.0137 | 0.0364 | 0.0032 | 0.0502 | 0.0047 | 0.0678 | 0.0198 |
| Ser_393 (M3) | 0.0000 | 0.0030 | 0.0000 | 0.0030 | 0.0002 | 0.0030 | 0.0005 | 0.0030 | 0.0000 | 0.0030 | 0.0000 | 0.0030 | 0.0000 | 0.0030 | 0.0000 | 0.0030 |
| Gly_246 (M0) | 1.0000 | 0.0030 | 0.9980 | 0.0030 | 0.9610 | 0.0097 | 0.9770 | 0.0092 | 0.9529 | 0.0123 | 0.9730 | 0.0132 | 0.9502 | 0.0034 | 0.9215 | 0.0303 |
| Gly_247 (M1) | 0.0000 | 0.0030 | 0.0000 | 0.0030 | 0.0390 | 0.0097 | 0.0230 | 0.0091 | 0.0407 | 0.0061 | 0.0256 | 0.0142 | 0.0429 | 0.0030 | 0.0761 | 0.0294 |
| Gly_248 (M2) | 0.0000 | 0.0030 | 0.0020 | 0.0030 | 0.0000 | 0.0030 | 0.0000 | 0.0030 | 0.0064 | 0.0062 | 0.0014 | 0.0030 | 0.0069 | 0.0058 | 0.0024 | 0.0030 |

Mass isotopomer distributions were corrected for natural isotope abundance. Errors were calculated as described in the supplementary text.

**Table S5** - Measured mass isotopomer distributions and calculated errors from [U-<sup>13</sup>C]glutamine during CAV2 infection.

| <b>Time (h)</b> | <b>0.00</b> | <b>0.02</b> | <b>0.25</b> | <b>0.608</b> | <b>1.217</b> | <b>3</b> | <b>8</b> | <b>24</b> |        |        |        |        |        |        |        |        |
|-----------------|-------------|-------------|-------------|--------------|--------------|----------|----------|-----------|--------|--------|--------|--------|--------|--------|--------|--------|
| 3PG_459 (M0)    | 1.0000      | 0.0030      | 1.0000      | 0.0030       | 1.0000       | 0.0030   | 1.0000   | 0.0030    | 1.0000 | 0.0030 | 1.0000 | 0.0030 | 1.0000 | 0.0030 | 1.0000 | 0.0030 |
| 3PG_460 (M1)    | 0.0000      | 0.0030      | 0.0000      | 0.0030       | 0.0000       | 0.0030   | 0.0000   | 0.0030    | 0.0000 | 0.0030 | 0.0000 | 0.0030 | 0.0000 | 0.0030 | 0.0000 | 0.0030 |
| 3PG_461 (M2)    | 0.0000      | 0.0030      | 0.0000      | 0.0030       | 0.0000       | 0.0030   | 0.0000   | 0.0030    | 0.0000 | 0.0030 | 0.0000 | 0.0030 | 0.0000 | 0.0030 | 0.0000 | 0.0030 |
| 3PG_462 (M3)    | 0.0000      | 0.0030      | 0.0000      | 0.0030       | 0.0000       | 0.0030   | 0.0000   | 0.0030    | 0.0000 | 0.0030 | 0.0000 | 0.0030 | 0.0000 | 0.0030 | 0.0000 | 0.0030 |
| PEP_369 (M0)    | 1.0000      | 0.0030      | 1.0000      | 0.0030       | 1.0000       | 0.0030   | 1.0000   | 0.0030    | 1.0000 | 0.0030 | 1.0000 | 0.0030 | 1.0000 | 0.0030 | 1.0000 | 0.0030 |
| PEP_370 (M1)    | 0.0000      | 0.0030      | 0.0000      | 0.0030       | 0.0000       | 0.0030   | 0.0000   | 0.0030    | 0.0000 | 0.0030 | 0.0000 | 0.0030 | 0.0000 | 0.0030 | 0.0000 | 0.0030 |
| PEP_371 (M2)    | 0.0000      | 0.0030      | 0.0000      | 0.0030       | 0.0000       | 0.0030   | 0.0000   | 0.0030    | 0.0000 | 0.0030 | 0.0000 | 0.0030 | 0.0000 | 0.0030 | 0.0000 | 0.0030 |
| PEP_372 (M3)    | 0.0000      | 0.0030      | 0.0000      | 0.0030       | 0.0000       | 0.0030   | 0.0000   | 0.0030    | 0.0000 | 0.0030 | 0.0000 | 0.0030 | 0.0000 | 0.0030 | 0.0000 | 0.0030 |
| Lac_261 (M0)    | 1.0000      | 0.0030      | 1.0000      | 0.0030       | 1.0000       | 0.0030   | 1.0000   | 0.0051    | 1.0000 | 0.0088 | 1.0000 | 0.0140 | 0.9990 | 0.0169 | 0.9990 | 0.0204 |
| Lac_262 (M1)    | 0.0000      | 0.0030      | 0.0000      | 0.0030       | 0.0000       | 0.0030   | 0.0000   | 0.0030    | 0.0000 | 0.0030 | 0.0000 | 0.0030 | 0.0000 | 0.0030 | 0.0000 | 0.0039 |
| Lac_263 (M2)    | 0.0000      | 0.0030      | 0.0000      | 0.0030       | 0.0000       | 0.0030   | 0.0000   | 0.0030    | 0.0000 | 0.0030 | 0.0000 | 0.0030 | 0.0000 | 0.0032 | 0.0000 | 0.0040 |
| Lac_264 (M3)    | 0.0000      | 0.0030      | 0.0000      | 0.0030       | 0.0000       | 0.0030   | 0.0000   | 0.0043    | 0.0000 | 0.0069 | 0.0000 | 0.0100 | 0.0040 | 0.0078 | 0.0079 | 0.0057 |
| Lac23_233 (M0)  | 1.0000      | 0.0030      | 1.0000      | 0.0030       | 1.0000       | 0.0030   | 1.0000   | 0.0052    | 1.0000 | 0.0088 | 0.9996 | 0.0134 | 0.9978 | 0.0154 | 0.9911 | 0.0121 |
| Lac23_234 (M1)  | 0.0000      | 0.0030      | 0.0000      | 0.0030       | 0.0000       | 0.0030   | 0.0000   | 0.0030    | 0.0000 | 0.0030 | 0.0000 | 0.0030 | 0.0000 | 0.0043 | 0.0000 | 0.0057 |
| Lac23_235 (M2)  | 0.0000      | 0.0030      | 0.0000      | 0.0030       | 0.0000       | 0.0030   | 0.0000   | 0.0047    | 0.0000 | 0.0076 | 0.0004 | 0.0107 | 0.0022 | 0.0111 | 0.0089 | 0.0063 |
| Ala_260 (M0)    | 1.0000      | 0.0030      | 1.0000      | 0.0030       | 1.0000       | 0.0030   | 1.0000   | 0.0030    | 1.0000 | 0.0049 | 1.0000 | 0.0079 | 1.0000 | 0.0101 | 1.0000 | 0.0122 |
| Ala_261 (M1)    | 0.0000      | 0.0030      | 0.0000      | 0.0030       | 0.0000       | 0.0030   | 0.0000   | 0.0030    | 0.0000 | 0.0030 | 0.0000 | 0.0030 | 0.0000 | 0.0030 | 0.0000 | 0.0030 |
| Ala_262 (M2)    | 0.0000      | 0.0030      | 0.0000      | 0.0030       | 0.0000       | 0.0030   | 0.0000   | 0.0030    | 0.0000 | 0.0030 | 0.0000 | 0.0030 | 0.0000 | 0.0030 | 0.0000 | 0.0030 |
| Ala_263 (M3)    | 0.0000      | 0.0030      | 0.0000      | 0.0030       | 0.0000       | 0.0030   | 0.0000   | 0.0030    | 0.0000 | 0.0039 | 0.0000 | 0.0057 | 0.0000 | 0.0067 | 0.0000 | 0.0077 |
| Ala23_232 (M0)  | 1.0000      | 0.0030      | 0.9928      | 0.0072       | 0.9688       | 0.0303   | 0.9754   | 0.0219    | 0.9876 | 0.0075 | 0.9674 | 0.0248 | 0.9608 | 0.0293 | 0.9729 | 0.0151 |
| Ala23_233 (M1)  | 0.0000      | 0.0030      | 0.0000      | 0.0030       | 0.0000       | 0.0030   | 0.0039   | 0.0037    | 0.0000 | 0.0030 | 0.0131 | 0.0115 | 0.0086 | 0.0062 | 0.0000 | 0.0032 |
| Ala23_234 (M2)  | 0.0000      | 0.0030      | 0.0072      | 0.0072       | 0.0312       | 0.0303   | 0.0207   | 0.0182    | 0.0124 | 0.0082 | 0.0195 | 0.0133 | 0.0305 | 0.0230 | 0.0271 | 0.0184 |
| Cit_591 (M0)    | 1.0000      | 0.0030      | 0.9888      | 0.0109       | 0.9527       | 0.0270   | 0.9369   | 0.0105    | 0.8049 | 0.0277 | 0.7233 | 0.0448 | 0.5757 | 0.0030 | 0.4839 | 0.0067 |
| Cit_592 (M1)    | 0.0000      | 0.0030      | 0.0000      | 0.0030       | 0.0000       | 0.0030   | 0.0000   | 0.0030    | 0.0000 | 0.0045 | 0.0000 | 0.0171 | 0.0058 | 0.0276 | 0.0530 | 0.0057 |
| Cit_593 (M2)    | 0.0000      | 0.0030      | 0.0000      | 0.0030       | 0.0164       | 0.0134   | 0.0000   | 0.0118    | 0.0123 | 0.0171 | 0.0552 | 0.0077 | 0.0912 | 0.0051 | 0.1133 | 0.0100 |

|              |        |        |        |        |        |        |        |        |        |        |        |        |        |        |        |        |
|--------------|--------|--------|--------|--------|--------|--------|--------|--------|--------|--------|--------|--------|--------|--------|--------|--------|
| Cit_594 (M3) | 0.0000 | 0.0030 | 0.0112 | 0.0112 | 0.0000 | 0.0030 | 0.0110 | 0.0048 | 0.0574 | 0.0407 | 0.0634 | 0.0252 | 0.0990 | 0.0443 | 0.1151 | 0.0461 |
| Cit_595 (M4) | 0.0000 | 0.0030 | 0.0000 | 0.0030 | 0.0205 | 0.0115 | 0.0455 | 0.0143 | 0.0682 | 0.0030 | 0.0708 | 0.0433 | 0.1438 | 0.0053 | 0.1578 | 0.0030 |
| Cit_596 (M5) | 0.0000 | 0.0030 | 0.0000 | 0.0030 | 0.0104 | 0.0038 | 0.0000 | 0.0226 | 0.0573 | 0.0093 | 0.0872 | 0.0045 | 0.0845 | 0.0177 | 0.0770 | 0.0421 |
| Cit_597 (M6) | 0.0000 | 0.0030 | 0.0000 | 0.0030 | 0.0000 | 0.0030 | 0.0065 | 0.0059 | 0.0000 | 0.0030 | 0.0000 | 0.0063 | 0.0000 | 0.0094 | 0.0000 | 0.0125 |
| AKG_346 (M0) | 1.0000 | 0.0030 | 0.9896 | 0.0067 | 0.8713 | 0.0581 | 0.8307 | 0.0148 | 0.6572 | 0.0902 | 0.5267 | 0.0858 | 0.4897 | 0.0178 | 0.3809 | 0.0255 |
| AKG_347 (M1) | 0.0000 | 0.0030 | 0.0000 | 0.0030 | 0.0000 | 0.0030 | 0.0000 | 0.0030 | 0.0000 | 0.0030 | 0.0064 | 0.0044 | 0.0006 | 0.0223 | 0.0267 | 0.0087 |
| AKG_348 (M2) | 0.0000 | 0.0030 | 0.0000 | 0.0030 | 0.0000 | 0.0030 | 0.0272 | 0.0235 | 0.0210 | 0.0113 | 0.0724 | 0.0487 | 0.0500 | 0.0130 | 0.0489 | 0.0030 |
| AKG_349 (M3) | 0.0000 | 0.0030 | 0.0062 | 0.0061 | 0.0098 | 0.0070 | 0.0081 | 0.0030 | 0.0387 | 0.0142 | 0.0800 | 0.0257 | 0.0948 | 0.0148 | 0.1194 | 0.0148 |
| AKG_350 (M4) | 0.0000 | 0.0030 | 0.0042 | 0.0042 | 0.0044 | 0.0044 | 0.0000 | 0.0030 | 0.0014 | 0.0030 | 0.0030 | 0.0030 | 0.0074 | 0.0044 | 0.0137 | 0.0082 |
| AKG_351 (M5) | 0.0000 | 0.0030 | 0.0000 | 0.0036 | 0.1145 | 0.0476 | 0.1340 | 0.0060 | 0.2817 | 0.0661 | 0.3115 | 0.0141 | 0.3575 | 0.0078 | 0.4104 | 0.0115 |
| Suc_289 (M0) | 1.0000 | 0.0030 | 0.9981 | 0.0030 | 0.8971 | 0.0436 | 0.9343 | 0.0649 | 0.8227 | 0.0382 | 0.6982 | 0.0311 | 0.6446 | 0.0676 | 0.4764 | 0.0144 |
| Suc_290 (M1) | 0.0000 | 0.0030 | 0.0000 | 0.0030 | 0.0488 | 0.0486 | 0.0000 | 0.0030 | 0.0000 | 0.0038 | 0.0251 | 0.0108 | 0.0149 | 0.0141 | 0.0405 | 0.0034 |
| Suc_291 (M2) | 0.0000 | 0.0030 | 0.0000 | 0.0030 | 0.0000 | 0.0030 | 0.0000 | 0.0113 | 0.0503 | 0.0228 | 0.0313 | 0.0298 | 0.0873 | 0.0030 | 0.1588 | 0.0447 |
| Suc_292 (M3) | 0.0000 | 0.0030 | 0.0000 | 0.0030 | 0.0000 | 0.0030 | 0.0000 | 0.0036 | 0.0000 | 0.0065 | 0.0013 | 0.0100 | 0.0017 | 0.0138 | 0.0027 | 0.0174 |
| Suc_293 (M4) | 0.0000 | 0.0030 | 0.0019 | 0.0030 | 0.0540 | 0.0030 | 0.0657 | 0.0491 | 0.1270 | 0.0506 | 0.2442 | 0.0030 | 0.2516 | 0.0382 | 0.3215 | 0.0094 |
| Fum_287 (M0) | 1.0000 | 0.0030 | 0.9623 | 0.0358 | 0.9094 | 0.0467 | 0.9201 | 0.0206 | 0.8032 | 0.0256 | 0.7361 | 0.0077 | 0.6030 | 0.0497 | 0.4856 | 0.0960 |
| Fum_288 (M1) | 0.0000 | 0.0030 | 0.0000 | 0.0030 | 0.0210 | 0.0208 | 0.0000 | 0.0030 | 0.0000 | 0.0040 | 0.0000 | 0.0137 | 0.0203 | 0.0064 | 0.0401 | 0.0030 |
| Fum_289 (M2) | 0.0000 | 0.0030 | 0.0278 | 0.0278 | 0.0186 | 0.0162 | 0.0282 | 0.0195 | 0.0467 | 0.0254 | 0.0877 | 0.0402 | 0.1002 | 0.0308 | 0.1216 | 0.0323 |
| Fum_290 (M3) | 0.0000 | 0.0030 | 0.0088 | 0.0086 | 0.0180 | 0.0129 | 0.0059 | 0.0067 | 0.0388 | 0.0158 | 0.0175 | 0.0196 | 0.0919 | 0.0452 | 0.1105 | 0.0548 |
| Fum_291 (M4) | 0.0000 | 0.0030 | 0.0012 | 0.0030 | 0.0330 | 0.0032 | 0.0458 | 0.0321 | 0.1112 | 0.0117 | 0.1586 | 0.0145 | 0.1847 | 0.0199 | 0.2422 | 0.0085 |
| Mal_419 (M0) | 1.0000 | 0.0030 | 0.9856 | 0.0137 | 0.9346 | 0.0333 | 0.9206 | 0.0049 | 0.7998 | 0.0409 | 0.6601 | 0.0653 | 0.5963 | 0.0459 | 0.4973 | 0.0702 |
| Mal_420 (M1) | 0.0000 | 0.0030 | 0.0072 | 0.0072 | 0.0301 | 0.0299 | 0.0000 | 0.0030 | 0.0099 | 0.0067 | 0.0185 | 0.0060 | 0.0302 | 0.0045 | 0.0308 | 0.0081 |
| Mal_421 (M2) | 0.0000 | 0.0030 | 0.0072 | 0.0072 | 0.0052 | 0.0036 | 0.0304 | 0.0238 | 0.0273 | 0.0100 | 0.0930 | 0.0503 | 0.0869 | 0.0224 | 0.1191 | 0.0353 |
| Mal_422 (M3) | 0.0000 | 0.0030 | 0.0000 | 0.0030 | 0.0000 | 0.0051 | 0.0000 | 0.0168 | 0.0411 | 0.0051 | 0.0827 | 0.0174 | 0.0890 | 0.0057 | 0.1265 | 0.0275 |
| Mal_423 (M4) | 0.0000 | 0.0030 | 0.0000 | 0.0030 | 0.0301 | 0.0049 | 0.0491 | 0.0109 | 0.1219 | 0.0192 | 0.1456 | 0.0086 | 0.1976 | 0.0133 | 0.2263 | 0.0155 |
| Asp_418 (M0) | 1.0000 | 0.0030 | 0.9979 | 0.0030 | 0.9491 | 0.0310 | 0.9568 | 0.0103 | 0.8880 | 0.0056 | 0.7464 | 0.0488 | 0.6838 | 0.0240 | 0.5851 | 0.0558 |
| Asp_419 (M1) | 0.0000 | 0.0030 | 0.0000 | 0.0030 | 0.0157 | 0.0156 | 0.0000 | 0.0030 | 0.0000 | 0.0030 | 0.0574 | 0.0486 | 0.0476 | 0.0269 | 0.0551 | 0.0230 |
| Asp_420 (M2) | 0.0000 | 0.0030 | 0.0000 | 0.0030 | 0.0084 | 0.0074 | 0.0201 | 0.0160 | 0.0200 | 0.0086 | 0.0557 | 0.0247 | 0.0538 | 0.0030 | 0.0802 | 0.0109 |

|              |        |        |        |        |        |        |        |        |        |        |        |        |        |        |        |        |
|--------------|--------|--------|--------|--------|--------|--------|--------|--------|--------|--------|--------|--------|--------|--------|--------|--------|
| Asp_421 (M3) | 0.0000 | 0.0030 | 0.0000 | 0.0030 | 0.0032 | 0.0030 | 0.0000 | 0.0107 | 0.0196 | 0.0045 | 0.0370 | 0.0120 | 0.0700 | 0.0030 | 0.0966 | 0.0136 |
| Asp_422 (M4) | 0.0000 | 0.0030 | 0.0021 | 0.0030 | 0.0236 | 0.0079 | 0.0232 | 0.0150 | 0.0725 | 0.0036 | 0.1035 | 0.0124 | 0.1448 | 0.0058 | 0.1830 | 0.0084 |
| Glu_432 (M0) | 1.0000 | 0.0030 | 0.9902 | 0.0061 | 0.8756 | 0.0530 | 0.8601 | 0.0157 | 0.6929 | 0.0527 | 0.5460 | 0.0640 | 0.5460 | 0.0419 | 0.4522 | 0.0502 |
| Glu_433 (M1) | 0.0000 | 0.0030 | 0.0000 | 0.0030 | 0.0014 | 0.0030 | 0.0013 | 0.0030 | 0.0000 | 0.0030 | 0.0196 | 0.0099 | 0.0196 | 0.0030 | 0.0317 | 0.0030 |
| Glu_434 (M2) | 0.0000 | 0.0030 | 0.0000 | 0.0030 | 0.0000 | 0.0030 | 0.0000 | 0.0030 | 0.0092 | 0.0030 | 0.0321 | 0.0105 | 0.0321 | 0.0030 | 0.0345 | 0.0124 |
| Glu_435 (M3) | 0.0000 | 0.0030 | 0.0003 | 0.0030 | 0.0037 | 0.0030 | 0.0024 | 0.0051 | 0.0334 | 0.0127 | 0.0781 | 0.0284 | 0.0781 | 0.0030 | 0.0967 | 0.0030 |
| Glu_436 (M4) | 0.0000 | 0.0030 | 0.0018 | 0.0030 | 0.0062 | 0.0062 | 0.0064 | 0.0064 | 0.0118 | 0.0116 | 0.0151 | 0.0141 | 0.0151 | 0.0122 | 0.0153 | 0.0102 |
| Glu_437 (M5) | 0.0000 | 0.0030 | 0.0078 | 0.0039 | 0.1131 | 0.0438 | 0.1299 | 0.0151 | 0.2527 | 0.0294 | 0.3092 | 0.0030 | 0.3092 | 0.0527 | 0.3696 | 0.0432 |
| Gln_431 (M0) | 1.0000 | 0.0030 | 0.2581 | 0.0087 | 0.2152 | 0.0220 | 0.2282 | 0.0091 | 0.2073 | 0.0300 | 0.1982 | 0.0391 | 0.2130 | 0.0243 | 0.2020 | 0.0354 |
| Gln_432 (M1) | 0.0000 | 0.0030 | 0.0000 | 0.0030 | 0.0000 | 0.0030 | 0.0000 | 0.0030 | 0.0000 | 0.0030 | 0.0081 | 0.0081 | 0.0000 | 0.0030 | 0.0006 | 0.0030 |
| Gln_433 (M2) | 0.0000 | 0.0030 | 0.0000 | 0.0030 | 0.0033 | 0.0033 | 0.0000 | 0.0030 | 0.0000 | 0.0030 | 0.0000 | 0.0030 | 0.0000 | 0.0030 | 0.0073 | 0.0073 |
| Gln_434 (M3) | 0.0000 | 0.0030 | 0.0034 | 0.0034 | 0.0033 | 0.0033 | 0.0038 | 0.0038 | 0.0025 | 0.0030 | 0.0033 | 0.0033 | 0.0053 | 0.0053 | 0.0076 | 0.0076 |
| Gln_435 (M4) | 0.0000 | 0.0030 | 0.0311 | 0.0311 | 0.0310 | 0.0310 | 0.0302 | 0.0302 | 0.0352 | 0.0352 | 0.0330 | 0.0330 | 0.0348 | 0.0348 | 0.0349 | 0.0349 |
| Gln_436 (M5) | 0.0000 | 0.0030 | 0.7074 | 0.0260 | 0.7471 | 0.0155 | 0.7377 | 0.0250 | 0.7550 | 0.0076 | 0.7573 | 0.0054 | 0.7469 | 0.0158 | 0.7476 | 0.0151 |
| Ser_390 (M0) | 1.0000 | 0.0030 | 1.0000 | 0.0030 | 1.0000 | 0.0030 | 1.0000 | 0.0030 | 1.0000 | 0.0030 | 1.0000 | 0.0030 | 1.0000 | 0.0030 | 1.0000 | 0.0030 |
| Ser_391 (M1) | 0.0000 | 0.0030 | 0.0000 | 0.0030 | 0.0000 | 0.0030 | 0.0000 | 0.0030 | 0.0000 | 0.0030 | 0.0000 | 0.0030 | 0.0000 | 0.0030 | 0.0000 | 0.0030 |
| Ser_392 (M2) | 0.0000 | 0.0030 | 0.0000 | 0.0030 | 0.0000 | 0.0030 | 0.0000 | 0.0030 | 0.0000 | 0.0030 | 0.0000 | 0.0030 | 0.0000 | 0.0030 | 0.0000 | 0.0030 |
| Ser_393 (M3) | 0.0000 | 0.0030 | 0.0000 | 0.0030 | 0.0000 | 0.0030 | 0.0000 | 0.0030 | 0.0000 | 0.0030 | 0.0000 | 0.0030 | 0.0000 | 0.0030 | 0.0000 | 0.0030 |
| Gly_246 (M0) | 1.0000 | 0.0030 | 1.0000 | 0.0030 | 1.0000 | 0.0030 | 1.0000 | 0.0030 | 1.0000 | 0.0030 | 1.0000 | 0.0030 | 1.0000 | 0.0030 | 1.0000 | 0.0030 |
| Gly_247 (M1) | 0.0000 | 0.0030 | 0.0000 | 0.0030 | 0.0000 | 0.0030 | 0.0000 | 0.0030 | 0.0000 | 0.0030 | 0.0000 | 0.0030 | 0.0000 | 0.0030 | 0.0000 | 0.0030 |
| Gly_248 (M2) | 0.0000 | 0.0030 | 0.0000 | 0.0030 | 0.0000 | 0.0030 | 0.0000 | 0.0030 | 0.0000 | 0.0030 | 0.0000 | 0.0030 | 0.0000 | 0.0030 | 0.0000 | 0.0030 |

Mass isotopomer distributions were corrected for natural isotope abundance. Errors were calculated as described in the supplementary text.

**Table S6** - Estimated fluxes and 95% confidence intervals from combined [1,2-<sup>13</sup>C]glucose and [U-<sup>13</sup>C]glutamine experiments.

| Reaction                | Growth (mock infection) |       |          | CAV2 infection |         |          |         |         |
|-------------------------|-------------------------|-------|----------|----------------|---------|----------|---------|---------|
|                         | Flux                    | LB    | UB       | Flux           | LB      | UB       |         |         |
| G6P <-> F6P             | R1                      | net   | 601.34   | 588.77         | 608.03  | 750.40   | 737.99  | 763.82  |
| G6P <-> F6P             |                         | exch. | 0.00     | 0              | Inf     | 2409.70  | 0       | Inf     |
| F6P -> FBP              | R2                      |       | 618.84   | 614.82         | 620.80  | 779.12   | 775.13  | 783.89  |
| FBP <-> DHAP + GAP      | R3                      | net   | 618.84   | 614.82         | 620.80  | 779.12   | 775.13  | 783.89  |
| FBP <-> DHAP + GAP      |                         | exch. | 1197.40  | 0              | Inf     | 92.76    | 0       | Inf     |
| DHAP <-> GAP            | R4                      | net   | 618.10   | 614.23         | 620.24  | 777.53   | 773.24  | 782.31  |
| DHAP <-> GAP            |                         | exch. | 5.18E+05 | 0              | Inf     | 2590.80  | 0       | Inf     |
| GAP <-> 3PG             | R5                      | net   | 1245.70  | 1241.60        | 1248.00 | 1571.00  | 1566.10 | 1574.70 |
| GAP <-> 3PG             |                         | exch. | 1.42E+04 | 0              | Inf     | 0.00     | 0       | Inf     |
| 3PG <-> PEP             | R6                      | net   | 1237.40  | 1199.30        | 1244.00 | 1563.90  | 1537.20 | 1571.30 |
| 3PG <-> PEP             |                         | exch. | 954.92   | 0              | Inf     | 1739.90  | 0       | Inf     |
| PEP -> Pyr.c            | R7                      |       | 1237.40  | 1199.30        | 1244.00 | 1563.90  | 1537.20 | 1571.30 |
| G6P -> P5P + CO2        | R8                      |       | 27.64    | 21.81          | 39.64   | 46.10    | 32.10   | 56.63   |
| P5P + P5P <-> GAP + S7P | R9                      | net   | 8.75     | 6.70           | 13.72   | 14.36    | 9.72    | 17.93   |
| P5P + P5P <-> GAP + S7P |                         | exch. | 0.86     | 0              | 11.19   | 3.31     | 0       | 15.91   |
| S7P + GAP <-> E4P + F6P | R10                     | net   | 8.75     | 6.70           | 13.72   | 14.36    | 9.72    | 17.93   |
| S7P + GAP <-> E4P + F6P |                         | exch. | 389.84   | 335.71         | 507.24  | 380.08   | 310.17  | 466.19  |
| E4P + P5P <-> GAP + F6P | R11                     | net   | 8.75     | 6.70           | 13.72   | 14.36    | 9.72    | 17.93   |
| E4P + P5P <-> GAP + F6P |                         | exch. | 461.72   | 171.47         | Inf     | 1.53E+05 | 84.08   | Inf     |
| Pyr.c <-> Lac           | R12                     | net   | 1244.80  | 1228.80        | 1258.20 | 1564.80  | 1547.80 | 1581.60 |
| Pyr.c <-> Lac           |                         | exch. | 0.00     | 0              | 280.77  | 0.00     | 0       | 130.20  |
| Pyr.c <-> Ala           | R13                     | net   | 35.65    | 28.00          | 43.54   | 45.60    | 36.19   | 53.11   |
| Pyr.c <-> Ala           |                         | exch. | 0.00     | 0              | 84.19   | 0.00     | 0       | 61.26   |
| Pyr.m -> AcCoA.m + CO2  | R14                     |       | 40.67    | 36.52          | 45.51   | 71.36    | 64.06   | 77.61   |
| Pyr.m + CO2 -> OAA      | R15                     |       | 112.22   | 105.99         | 123.07  | 133.77   | 118.76  | 148.57  |
| OAA + AcCoA.m -> Cit    | R16                     |       | 77.56    | 74.49          | 80.67   | 112.87   | 107.59  | 116.91  |
| Cit <-> AKG + CO2       | R17                     | net   | 62.37    | 59.10          | 66.14   | 80.13    | 74.72   | 84.85   |
| Cit <-> AKG + CO2       |                         | exch. | 20.40    | 17.10          | 23.41   | 41.18    | 34.62   | 47.19   |
| AKG -> SucCoA + CO2     | R18                     |       | 133.96   | 128.29         | 138.53  | 177.38   | 169.19  | 185.34  |
| SucCoA <-> Suc          | R19                     | net   | 133.96   | 128.29         | 138.53  | 177.38   | 169.19  | 185.34  |
| SucCoA <-> Suc          |                         | exch. | 8704.90  | 0              | Inf     | 531.62   | 0       | Inf     |
| Suc <-> Fum             | R20                     | net   | 139.46   | 133.90         | 144.54  | 191.02   | 183.01  | 200.06  |
| Suc <-> Fum             |                         | exch. | 21.55    | 7.75           | 38.98   | 78.36    | 53.77   | 106.39  |
| Fum <-> Mal             | R21                     | net   | 140.27   | 134.69         | 146.90  | 192.09   | 183.55  | 202.06  |
| Fum <-> Mal             |                         | exch. | 8.80E+04 | 2612.00        | Inf     | 4.52E+05 | 5882.90 | Inf     |
| Mal <-> OAA             | R22                     | net   | -40.63   | -53.92         | -30.21  | -44.62   | -59.70  | -28.85  |
| Mal <-> OAA             |                         | exch. | 2545.50  | 1244.10        | Inf     | 6790.80  | 1616.30 | Inf     |
| Mal -> Pyr.m + CO2      | R23                     |       | 180.90   | 167.16         | 195.62  | 236.72   | 219.38  | 257.64  |

|                       |         |          |         |         |         |         |         |
|-----------------------|---------|----------|---------|---------|---------|---------|---------|
| Cit -> OAA + AcCoA.c  | R24     | 15.18    | 12.07   | 18.84   | 32.73   | 28.51   | 36.45   |
| Gln -> Glu            | R25     | 80.69    | 80.22   | 81.08   | 112.96  | 112.49  | 113.50  |
| AKG <-> Glu           | R26 net | -71.58   | -76.09  | -67.39  | -97.25  | -103.74 | -91.45  |
| AKG <-> Glu           | exch.   | 1.43E+05 | 5233.10 | Inf     | 2872.90 | 1281.20 | NaN     |
| Asn <-> Asp           | R27 net | -3.49    | -7.13   | -0.19   | -1.88   | -7.16   | 0.13    |
| Asn <-> Asp           | exch.   | 15.07    | 5.48    | 36.36   | 6.74    | 3.96    | 20.60   |
| Asp <-> OAA           | R28 net | -9.21    | -13.07  | -5.56   | -9.01   | -14.10  | -6.26   |
| Asp <-> OAA           | exch.   | 0.00     | 0       | 12.99   | 0.00    | 0       | 17.26   |
| 3PG -> Ser            | R29     | 8.26     | 2.82    | 57.00   | 7.06    | 4.03    | 36.07   |
| Ser -> Pyr.c          | R30     | 14.97    | 5.46    | 58.18   | 14.86   | 10.40   | 47.15   |
| Ser <-> Gly + C1      | R31 net | 1.16     | 0.54    | 1.86    | 2.54    | 1.12    | 3.50    |
| Ser <-> Gly + C1      | exch.   | 40.35    | 7.16    | 361.54  | 17.40   | 9.64    | 81.27   |
| Glu <-> Pro           | R32 net | -2.22    | -5.68   | 0.84    | 0.48    | -3.78   | 4.20    |
| Glu <-> Pro           | exch.   | 32.94    | 24.15   | 47.97   | 98.45   | 66.91   | 159.60  |
| Val breakdown         | R33     | 0.00     | 0       | 2.83    | 6.17    | NaN     | 8.92    |
| Ile breakdown         | R34     | 5.50     | 4.37    | 6.23    | 6.89    | 6.15    | 7.69    |
| Leu breakdown         | R35     | 6.94     | 6.06    | 7.84    | 7.92    | 5.99    | 9.55    |
| Thr breakdown         | R36     | 4.03     | 3.30    | 4.75    | 4.35    | 3.20    | 5.54    |
| Phe -> Tyr            | R37     | 0.31     | 0       | 0.80    | 0.00    | 0       | 0.91    |
| Tyr breakdown         | R38     | 0.82     | 0.00    | 1.45    | 1.07    | 0.66    | 2.13    |
| Met breakdown         | R39     | 0.00     | 0       | 0.37    | 0.58    | 0       | 1.74    |
| Lys breakdown         | R40     | 2.45     | 0.60    | 4.34    | 2.19    | NaN     | 3.38    |
| His -> Glu + C1       | R41     | 0.28     | 0       | 0.85    | 0.00    | 0       | 0.48    |
| Arg -> Glu + Urea.snk | R42     | 3.95     | 2.09    | 61.61   | 7.16    | 5.42    | 9.60    |
| Glu + CO2 -> Arg      | R43     | 0.00     | 0       | 3.45    | 0.00    | 0       | 12.25   |
| Pyr.c <-> Pyr.m       | R44 net | -28.01   | -34.17  | -16.68  | -31.58  | -43.66  | -22.01  |
| Pyr.c <-> Pyr.m       | exch.   | 189.06   | 169.86  | 216.11  | 274.99  | 250.75  | 305.19  |
| CO2 <-> CO2.ext       | R45 net | 339.05   | 327.33  | 356.52  | 489.54  | 458.55  | 513.30  |
| CO2 <-> CO2.ext       | exch.   | 0.00     | 0       | Inf     | 2342.40 | 0       | Inf     |
| Glc.ext -> G6P        | R46     | 630.77   | 630.77  | 630.77  | 800.34  | 800.34  | 800.34  |
| Lac <-> Lac.ext       | R47 net | 1244.80  | 1228.80 | 1258.20 | 1564.80 | 1547.80 | 1581.60 |
| Lac <-> Lac.ext       | exch.   | 399.76   | 280.50  | 467.49  | 665.82  | 548.37  | 812.43  |
| Ala <-> Ala.ext       | R48 net | 32.03    | 24.32   | 39.78   | 37.81   | 30.17   | 45.90   |
| Ala <-> Ala.ext       | exch.   | 40.64    | 29.91   | 151.39  | 71.13   | 58.47   | 149.67  |
| Gln.ext -> Gln        | R49     | 82.63    | 82.63   | 82.63   | 117.14  | 117.14  | 117.14  |
| Glu <-> Glu.ext       | R50 net | 13.23    | 10.78   | 15.52   | 17.38   | 13.04   | 22.68   |
| Glu <-> Glu.ext       | exch.   | 0.00     | 0       | 2.26    | 0.00    | 0       | 2.06    |
| Asp <-> Asp.ext       | R51 net | 2.88     | 1.69    | 4.07    | 1.01    | -0.59   | 2.68    |
| Asp <-> Asp.ext       | exch.   | 0.23     | 0       | 3.41    | 0.00    | 0       | 3.46    |
| Asn <-> Asn.ext       | R52 net | 1.75     | -1.61   | 5.40    | -1.86   | -3.87   | 3.80    |
| Asn <-> Asn.ext       | exch.   | 1.50     | 0       | 3.72    | 0.00    | 0       | 8.01    |
| Ser.ext <-> Ser       | R53 net | 11.09    | 6.48    | 14.64   | 17.83   | 14.98   | 20.91   |
| Ser.ext <-> Ser       | exch.   | 0.00     | 0       | 185.03  | 11.88   | 0       | 133.74  |
| Gly <-> Gly.ext       | R54 net | 1.23     | 0.55    | 2.13    | -1.65   | -2.89   | -0.38   |

|                   |         |        |        |        |       |       |       |
|-------------------|---------|--------|--------|--------|-------|-------|-------|
| Gly <-> Gly.ext   | exch.   | 12.51  | 0      | 169.53 | 0.00  | 0     | 24.39 |
| Pro.ext <-> Pro   | R55 net | 4.11   | 1.11   | 7.79   | 3.58  | -0.57 | 8.26  |
| Pro.ext <-> Pro   | exch.   | 0.00   | 0      | 3.51   | 0.00  | 0     | NaN   |
| Val.ext -> Val    | R56     | 2.50   | 2.06   | 5.00   | 11.57 | 8.70  | 14.88 |
| Ile.ext -> Ile    | R57     | 7.45   | 6.62   | 8.12   | 11.10 | 10.51 | 11.74 |
| Leu.ext -> Leu    | R58     | 10.34  | 9.57   | 11.17  | 15.24 | 12.76 | 17.03 |
| Thr.ext -> Thr    | R59     | 6.35   | 5.47   | 7.34   | 9.36  | 8.07  | 10.69 |
| Phe.ext -> Phe    | R60     | 1.63   | 1.25   | 1.96   | 2.84  | 2.51  | 3.81  |
| Tyr.ext -> Tyr    | R61     | 1.60   | 1.24   | 1.95   | 3.43  | 3.17  | 3.71  |
| Met.ext -> Met    | R62     | 0.83   | 0.68   | 1.16   | 2.37  | 1.72  | 3.52  |
| Lys.ext -> Lys    | R63     | 5.88   | 3.89   | 7.53   | 9.58  | 8.72  | 10.35 |
| His.ext -> His    | R64     | 1.15   | 0.73   | 1.58   | 1.86  | 1.62  | 2.31  |
| Arg.ext <-> Arg   | R65 net | 6.22   | 4.41   | 8.51   | 12.05 | 10.72 | 13.47 |
| Arg.ext <-> Arg   | exch.   | 166.37 | 0      | Inf    | 0.00  | 0     | Inf   |
| Biomass formation | R66     | 0.0111 | 0.0089 | 0.0138 | 0.02  | 0.02  | 0.03  |

Estimated fluxes and 95% confidence intervals are in units of nmol/10<sup>6</sup> cells/h. LB – lower bound; UB – upper bound.
